1 **Title**

2 Hypoxia potentiates the inflammatory fibroblast phenotype promoted by pancreatic cancer cell-  
3 derived cytokines

4  
5 **Authors**

6 Simon Schwörer<sup>1</sup>, Manon Ros<sup>2,†</sup>, Kaloyan M. Tsanov<sup>1,†</sup>, Francesco V. Cimino<sup>1,†</sup>, Scott W.  
7 Lowe<sup>1,3</sup>, Carlos Carmona-Fontaine<sup>2</sup>, Craig B. Thompson<sup>1,\*</sup>

8  
9 **Affiliations**

10 <sup>1</sup>Cancer Biology and Genetics Program, Sloan Kettering Institute, Memorial Sloan Kettering  
11 Cancer Center, New York, NY, USA

12 <sup>2</sup>Center for Genomics & Systems Biology, New York University, New York, NY, USA

13 <sup>3</sup>Howard Hughes Medical Institute, Chevy Chase, MD, USA

14 <sup>†</sup>These authors contributed equally to this work

15 \* Correspondence: [thompsonc@mskcc.org](mailto:thompsonc@mskcc.org)

16  
17 **Abstract**

18 Cancer-associated fibroblasts (CAFs) are a major cell type in the stroma of solid tumors and  
19 can exert both tumor-promoting and tumor-restraining functions. This functional heterogeneity is  
20 correlated with the existence of transcriptionally distinct subpopulations of CAFs. CAF  
21 heterogeneity is observed in pancreatic ductal adenocarcinoma (PDAC), a tumor characterized  
22 by a remarkably dense and hypoxic stroma that features tumor-restraining myofibroblastic CAFs  
23 (myCAFs) and tumor-supporting inflammatory CAFs (iCAFs). While CAF heterogeneity can be  
24 driven in part by tumor cell-produced cytokines, other determinants shaping CAF identity and  
25 function are largely unknown. *In vivo*, we found that iCAFs display a hypoxic gene expression  
26 and biochemical profile and are enriched in hypoxic regions of PDAC tumors. Hypoxia leads  
27 fibroblasts to acquire an inflammatory gene expression signature and synergizes with cancer  
28 cell-derived cytokines to promote an iCAF phenotype in a HIF-1 $\alpha$  dependent fashion.  
29 Furthermore, we show that HIF-1 $\alpha$  stabilization is sufficient to induce an iCAF phenotype in  
30 stromal cells introduced into PDAC organoid co-cultures and to promote PDAC tumor growth.  
31 These findings indicate hypoxia-induced HIF-1 $\alpha$  as a regulator of CAF heterogeneity and  
32 promoter of tumor progression in PDAC.

### 33 **Introduction**

34 Pancreatic ductal adenocarcinoma (PDAC) is an aggressive tumor and projected to become the  
35 second-leading cause of cancer-related mortality by 2030 in the United States (1). A significant  
36 barrier to the delivery of effective therapy for PDAC is the desmoplastic stroma that can  
37 constitute up to 90% of the tumor volume (1). The prominent desmoplastic response observed  
38 in PDAC is characterized by a fibrotic and inflammatory stromal milieu which is produced  
39 primarily by cancer-associated fibroblasts (CAFs) and plays a role in both supporting tumor cell  
40 growth and promoting therapeutic resistance (2). The basal activity of CAFs to produce  
41 extracellular matrix is not sufficient to mediate these effects, as depletion of CAF-derived  
42 collagen promotes PDAC growth and reduces survival in mouse models (3). Thus, CAFs can  
43 have either tumor-promoting or tumor-suppressing properties within the pancreatic tumor  
44 microenvironment (TME).

45  
46 Transcriptionally and functionally heterogeneous subsets of CAFs have been identified in  
47 mouse and human PDAC (4–7). Myfibroblastic CAFs (myCAF) are marked by expression of  
48 alpha smooth muscle actin ( $\alpha$ SMA), produce extracellular matrix and are thought to restrain  
49 tumor growth (8). Inflammatory CAFs (iCAF) express only low levels of  $\alpha$ SMA, produce a  
50 variety of growth factors and inflammatory cytokines such as IL6 and can directly and indirectly  
51 promote tumor growth (9). Other, cancer-associated phenotypes of fibroblasts have also been  
52 reported, including antigen-presenting CAFs (apCAF) marked by MHC-II expression (5).  
53 Heterogeneity within the CAF population has been suggested to be established in part by  
54 growth factor and cytokine gradients within the TME including the local accumulation of tumor-  
55 derived TGF $\beta$  and IL1/TNF $\alpha$  (10), indicating that spatial differences in the accumulation of  
56 different CAF subpopulations exist. However, whether the metabolic conditions present in the  
57 pancreatic TME also contribute to regulating CAF heterogeneity is less well explored.

58  
59 Understanding regulators of CAF heterogeneity has clinical implications: while PDAC patients  
60 with high amounts of myCAF in tumors had improved overall survival, they responded poorly to  
61 anti-PD-L1 therapy in retrospective studies (6,8). In contrast, iCAF are associated with poor  
62 response to chemotherapy in patients (11), and iCAF-derived factors including IL6 are directly  
63 involved in PDAC progression in mouse models (12–14). Thus, a better understanding of the  
64 determinants of CAF heterogeneity may facilitate the development of therapies selectively  
65 targeting tumor promoting CAFs.

66

67 The TME of PDAC is characterized by nutrient depletion and hypoxia as a result of increased  
68 cancer cell demand and impaired vascularization (15,16). Hypoxia results in stabilization of the  
69 transcription factor HIF-1 $\alpha$  which mediates cellular adaptation to low oxygen tension (17). In  
70 cancer cells, this adaptive response promotes epithelial-mesenchymal transition and  
71 angiogenesis, and a hypoxia gene expression signature is associated with poor prognosis of  
72 PDAC patients (18,19). In the stroma, hypoxia is known to promote lysyl oxidase expression to  
73 increase collagen crosslinking and tumor stiffness (20). Hypoxia is associated with an  
74 inflammatory fibroblast expression signature in genomic studies of human PDAC and has been  
75 shown to promote a secretory phenotype in CAFs while conversely, reducing  $\alpha$ SMA expression  
76 (21–24). These data suggest that hypoxia could influence the CAF phenotype, but whether  
77 hypoxia is involved in the generation of distinct CAF subsets in PDAC is unknown. Here, we  
78 report the ability of hypoxia to synergize with cancer cell-derived cytokines to promote the iCAF  
79 phenotype and tumor growth in PDAC.

80

## 81 Results

82 To investigate factors regulating CAF heterogeneity in PDAC, we analyzed publicly available  
83 single cell RNA (scRNA) sequencing data from human PDAC patients (5). Single sample gene  
84 set enrichment analysis (GSEA) comparing myCAFs and iCAFs revealed enrichment of an  
85 inflammatory response signature in iCAFs and a collagen formation signature in myCAFs (Fig.  
86 1A), as reported (5). Using these data, we found that an oxidative phosphorylation signature  
87 was enriched in myCAFs (Fig. 1A), consistent with our previous work showing that  
88 mitochondrial oxidative metabolism is required for proline biosynthesis and for collagen  
89 production (25). Conversely, a hypoxic gene expression signature was enriched in iCAFs (Fig.  
90 1A). To confirm this finding, we used a murine orthotopic PDAC organoid transplantation model  
91 which closely recapitulates key features of human PDAC (26). PDAC organoids derived from  
92 the KPC (*Kras*<sup>LSL-G12D/+</sup>; *Trp53*<sup>LSL-R172H/+</sup>; *Pdx1-Cre*) mouse model (27) were injected orthotopically  
93 into the pancreas of syngeneic C57BL/6 mice. Once tumors reached ~500 mm<sup>3</sup>, pimonidazole,  
94 a hypoxia indicator (28), was injected intraperitoneally one hour before euthanasia (Fig. 1B).  
95 Half of each tumor was digested, and CAFs (gated for CD31<sup>-</sup>CD45<sup>-</sup>EpCAM<sup>-</sup>PDPN<sup>+</sup> cells) were  
96 counterstained for Ly6C as an iCAF surface marker (10) and analyzed for pimonidazole  
97 accumulation by flow cytometry (Fig. 1C-E). Consistent with the gene expression data, this  
98 analysis revealed that Ly6C<sup>+</sup> CAFs had accumulated higher amounts of pimonidazole than  
99 Ly6C<sup>-</sup> CAFs (Fig 1D, E). Next, we analyzed the other halves of the PDAC tumors for the  
100 presence of pimonidazole, the general CAF marker PDPN and the myCAF marker  $\alpha$ SMA by  
101 immunofluorescence (Fig. 1F). Strikingly, the vast majority of  $\alpha$ SMA<sup>+</sup> cells was located outside  
102 pimonidazole<sup>+</sup> areas (Fig. 1F). In turn, 80% of the PDPN<sup>+</sup> areas within pimonidazole<sup>+</sup> regions  
103 stained negative for  $\alpha$ SMA (Fig.1F, G).

104  
105 The above data indicate a significant positive correlation between hypoxia and the iCAF  
106 phenotype in PDAC. To test the hypothesis that hypoxia promotes acquisition of an iCAF state  
107 in fibroblasts, we cultured immortalized pancreatic stellate cells (PSCs) for 48 hours in normoxic  
108 (20% O<sub>2</sub>) or hypoxic (0.5% O<sub>2</sub>) conditions and interrogated the transcriptome by RNA-  
109 sequencing. Hypoxic culture conditions resulted in enrichment of an inflammatory response  
110 signature, IL6/JAK/STAT signaling as well as an iCAF signature in PSCs (Fig. 1H).

111  
112 IL1 and TNF $\alpha$  have been identified as major cytokines secreted by pancreatic cancer cells that  
113 are capable of inducing an iCAF phenotype in PDAC (10). In order to assess the role of hypoxia  
114 in regulating CAF heterogeneity in relation to known inducers of the iCAF state, we treated  
115 PSCs with a combination of IL1 and TNF $\alpha$  (hereafter “cytokines”) to maximize cytokine signaling

116 known to promote an iCAF phenotype. As previously reported (10), cytokine treatment resulted  
117 in induction of the iCAF marker *IL6* and repression of the myCAF marker  $\alpha$ SMA (encoded by  
118 *Acta2*, hereafter  $\alpha$ SMA) (Sup. Fig. 1A). When we cultured cytokine-treated PSCs in hypoxia  
119 there was a significant increase in *IL6* expression but no additional changes in  $\alpha$ SMA mRNA  
120 levels (Sup. Fig. 1A). To monitor acquisition of an iCAF state in PSCs by orthogonal methods,  
121 we developed a reporter system in which EGFP expression is driven by the murine *IL6* promoter  
122 region (Fig. 2A). Responsiveness of the reporter to cytokine treatment was confirmed (Fig. 2A,  
123 B). Hypoxia was sufficient to increase the *IL6*-EGFP reporter signal to a similar level as did  
124 cytokine treatment, and culture of cytokine-treated cells in hypoxia further increased the reporter  
125 signal to more than 15-fold above mock-treated cells cultured in normoxia (Fig. 2A, B). Next, we  
126 combined our iCAF reporter with a myCAF reporter in which DsRed expression is driven by the  
127 murine  $\alpha$ SMA promoter region (29). Cytokine treatment reduced  $\alpha$ SMA-DsRed levels, with  
128 hypoxia providing little further reduction of the  $\alpha$ SMA-DsRed signal at doses of cytokines that  
129 maximize  $\alpha$ SMA-DsRed suppression (Fig. 2C). In contrast, both cytokines and hypoxia  
130 increased *IL6*-EGFP levels individually to similar levels and when combined led to marked  
131 accumulation of the *IL6*-EGFP signal (Fig. 2C).

132  
133 In tumors, there are gradients of oxygen and nutrient availability (30). To better model these  
134 gradients, we cultured PSCs together with cytokines in a metabolic microenvironment chamber  
135 (MEMIC) which allows the establishment of oxygen and nutrient gradients within the same  
136 culture well (Fig. 2D) (31,32). Using PSCs expressing the hypoxia reporter HRE-dUnaG (33),  
137 we confirmed establishment of an oxygen gradient along the MEMIC (Sup. Fig. 1B, C).  $\alpha$ SMA-  
138 DsRed reporter levels gradually declined along the gradient (Sup. Fig. 1B-E). Consistent with  
139 the above data, the *IL6*-EGFP reporter signal increased towards ischemic regions (Fig. 2E, F;  
140 Sup. Fig. 1D, E), indicating that PSCs acquire iCAF markers in ischemic conditions.

141  
142 While PSCs cultured on plastic are considered myCAFs, PSCs cultured in Matrigel become  
143 quiescent and can acquire an iCAF state when co-cultured with PDAC organoids in Matrigel (4),  
144 a process dependent on organoid-derived cytokines (10). Consistent with this, we observed  
145 higher levels of *IL6*-EGFP but lower levels of  $\alpha$ SMA-DsRed in PSCs co-cultured with KPC  
146 organoids in Matrigel for five days (Sup. Fig. 2A-D). Next, co-cultures of PSCs and KPC  
147 organoids were placed in hypoxia for the last 48h of the culture period. Hypoxia was sufficient to  
148 elevate expression of *IL6*-EGFP in PSCs to similar levels as did organoid co-culture, and  
149 exposure of co-cultures to hypoxia further elevated *IL6*-EGFP reporter levels in PSCs (Fig. 2G,  
150 H).

151  
152 The above data indicate that hypoxia potentiates the ability of cancer cell-secreted cytokines to  
153 promote acquisition of an iCAF phenotype in PSCs. To define the underlying mechanism, we  
154 analyzed transcription factor activity in CAFs in human PDAC scRNA-sequencing data by  
155 Virtual Inference of Protein Activity by Enriched Regulon (VIPER) analysis (5). As expected,  
156 high SMAD2 activity was found in myCAFs, while STAT3 activity was enriched in iCAFs (Fig.  
157 3A). In addition, HIF-1 $\alpha$  activity was enriched in iCAFs (Fig. 3A). *Hif1a* is not transcribed basally  
158 in resting fibroblasts and its transcription is induced by growth factor and/or cytokine stimulation  
159 (34). Even when transcription is induced, fibroblasts like other cells do not accumulate HIF-1 $\alpha$   
160 protein due to the oxygen-dependent degradation by VHL (35). Like fibroblasts, PSCs  
161 accumulated little HIF-1 $\alpha$  under hypoxia, however, when stimulated by cytokines under hypoxic  
162 conditions HIF-1 $\alpha$  was upregulated synergistically, and we observed increased expression of  
163 the HIF-1 $\alpha$  target LDHA compared to hypoxia alone (Fig. 3B). Higher levels of HIF-1 $\alpha$  were also  
164 found in PSCs co-treated with cytokines and cobalt chloride (CoCl<sub>2</sub>), a known inducer of HIF-1 $\alpha$   
165 stabilization and signaling (35), compared to CoCl<sub>2</sub> treatment alone (Sup. Fig. 3A). While CoCl<sub>2</sub>  
166 treatment alone could also increase levels of the *IL6*-EGFP reporter, combined treatment with  
167 CoCl<sub>2</sub> and cytokines elevated the *IL6*-EGFP signal even more (Sup. Fig. 3A-C).

168  
169 To investigate the role of HIF-1 $\alpha$  in regulating the iCAF state in hypoxia, we expressed *Hif1a*  
170 sgRNAs which reduced HIF-1 $\alpha$  protein levels in mock-treated as well as cytokine-treated cells in  
171 hypoxia (Fig. 3C). Induction of *IL6*, *Cxcl1* and *Ldha* mRNA in PSCs cultured in hypoxia was  
172 dependent on *Hif1a* (Fig. 3D). On a global gene expression level, inflammatory response,  
173 IL6/JAK/STAT signaling and iCAF signatures were depleted in hypoxic PSCs expressing *Hif1a*  
174 sgRNA (Fig. 3E). In addition, the hypoxia-induced increase in *IL6*-EGFP fluorescence required  
175 *Hif1a* (Fig. 3F, G). Given the upregulation of HIF-1 $\alpha$  in hypoxic cells by cytokine treatment, we  
176 also analyzed *Hif1a* sgRNA expressing PSCs in the presence of cytokines. *Hif1a* sgRNA  
177 prevented the synergistic accumulation of *IL6*-EGFP in cytokine-treated PSCs cultured in  
178 hypoxia (Fig. 3G). Similar results were obtained in *Hif1a* sgRNA expressing PSCs treated with  
179 CoCl<sub>2</sub> (Sup. Fig. 3D). Moreover, the hypoxia-induced upregulation of *IL6*-EGFP reporter levels  
180 in PSCs co-cultured with KPC organoids without addition of exogenous cytokines beyond those  
181 produced by organoid cultures was also dependent on *Hif1a* (Fig. 3H, I).

182  
183 Next, we investigated whether HIF-1 $\alpha$  stabilization can be sufficient to shift fibroblasts towards  
184 an iCAF state. To induce HIF-1 $\alpha$  accumulation under normoxic conditions, we deleted *Vhl*,  
185 which targets hydroxylated HIF-1 $\alpha$  for proteasomal degradation (35) (Fig. 4A). *Vhl* deleted PSCs

186 displayed higher expression of *IL6*, *Cxcl1* and *Ldha* mRNA (Fig. 4B). *Vhl* deletion alone  
187 increased *IL6*-EGFP levels more than cytokine treatment, and when combined, *Vhl* deletion and  
188 cytokines elevated *IL6*-EGFP reporter signals ten-fold (Fig. 4A, C, D). *Vhl* deletion also  
189 promoted *IL6*-EGFP signal in PSCs co-cultured with KPC organoids without addition of  
190 exogenous cytokines (Fig. 4E, F). Given that iCAFs can promote tumor growth (10), we sought  
191 to test whether *Vhl* deletion in PSCs would increase their ability to promote tumor growth *in vivo*.  
192 Co-injection of PSCs together with KPC pancreatic cancer cells promoted tumor growth  
193 compared to KPC cells alone in a subcutaneous allograft model (Fig. 4G), as reported before  
194 (36,37). Notably, co-injection of *Vhl*-deleted PSCs increased tumor growth significantly more  
195 than control PSCs (Fig. 4G). Taken together, our data indicate hypoxia-induced HIF-1 $\alpha$  as a  
196 novel regulator of CAF heterogeneity and tumor growth in PDAC.

## 197 **Discussion**

198 Poor vascularization and the resulting generation of hypoxic areas are a feature of the  
199 microenvironment of virtually all solid tumors (38). In particular, hypoxia is has long been  
200 recognized as a characteristic of the PDAC TME and is associated with poor outcomes of  
201 PDAC patients which is at least in part due to its influence on the cancer cells (15,16,18,19).  
202 Whether hypoxia also affects the stromal cell state in the PDAC TME and their influence on  
203 tumor progression is less well understood. Here, we show that hypoxia shifts pancreatic  
204 fibroblasts towards acquisition of an inflammatory state that is tumor supporting. In addition,  
205 hypoxia potentiates the effects of cytokines secreted by PDAC cells that can promote the iCAF  
206 phenotype (10). This is consistent with our observations that iCAFs accumulate biochemical  
207 markers of hypoxia and that  $\alpha$ SMA-negative CAFs are largely absent from hypoxic regions in  
208 murine PDAC. Furthermore, iCAFs display a hypoxic gene expression profile in human PDAC  
209 patients. These data indicate hypoxia as an environmental regulator of fibroblast heterogeneity  
210 in PDAC. Besides reduced oxygen tension, another consequence of inadequate vascularization  
211 and cancer cell metabolic activity in tumors is nutrient deprivation. In our *in vivo* and MEMIC  
212 experiments, we could not distinguish whether effects on  $\alpha$ SMA or IL6 expression are mediated  
213 by hypoxia or nutrient scarcity or a combination thereof. However, our experiments in hypoxic  
214 culture conditions suggest that hypoxia alone can be sufficient to induce an inflammatory  
215 phenotype in PSCs.

216  
217 The idea that hypoxia promotes an inflammatory response has been supported by several  
218 studies. In mice, short term exposure to hypoxia is sufficient to promote accumulation of  
219 inflammatory cells in several tissues and increases serum levels of various cytokines (39). In  
220 humans, three nights at high altitude increases levels of IL6 in the circulation (40). In addition to  
221 being observed in tumors, hypoxia is also a feature of wounds, and fibroblast heterogeneity has  
222 been observed in wound healing (41,42). Thus, our observations further support the idea that  
223 cancer cells can co-opt the normal stromal regenerative response to support tumor growth (43).

224  
225 We found that the hypoxia-induced shift of PSCs towards an iCAF state is mediated by HIF-1 $\alpha$ .  
226 Furthermore, hypoxia potentiates the ability of cytokines to promote acquisition of an iCAF  
227 phenotype in PSCs in a HIF-1 $\alpha$ -dependent fashion. Elevated HIF-1 $\alpha$  protein levels in hypoxic  
228 PSCs stimulated with cytokines likely results from increased *Hif1 $\alpha$*  transcription induced by  
229 NF $\kappa$ B signaling as a result of cytokine stimulation (34,44). Furthermore, cytokine signaling and  
230 HIF-1 $\alpha$  cooperate to activate HIF-1 $\alpha$  transcriptional activity by co-binding of STAT3 to promoter  
231 regions of HIF-1 $\alpha$  target genes (45). Given that hypoxia can promote inflammatory cytokine



232 production in cancer cells (46), a feed forward mechanism resulting in autocrine cytokine  
233 signaling is also conceivable. While our data indicate a major role of HIF-1 $\alpha$  in the hypoxia-  
234 induced inflammatory response, we cannot exclude involvement of HIF-2 $\alpha$  in this process. HIF-  
235 2 $\alpha$  but not HIF-1 $\alpha$  expression in  $\alpha$ SMA<sup>+</sup> CAFs has been shown to accelerate PDAC progression  
236 by establishing an immunosuppressive TME (47).

237  
238 We provide evidence that *Vhl* deletion in PSCs induces an inflammatory response and  
239 promotes tumor growth in an allograft co-injection experiment. While the *in vitro* data suggests  
240 that it is the *Vhl*-deletion induced inflammatory cytokine expression that mediates this effect, we  
241 cannot exclude that other effects resulting from *Vhl* deletion in PSCs could support tumor  
242 growth. In addition, it is possible that other effects resulting from *Vhl* deletion besides the  
243 stabilization of HIF-1 $\alpha$  are involved in this process.

244  
245 Taken together, our work suggests that targeting tumor hypoxia could reduce accumulation of  
246 pro-tumorigenic iCAFs in PDAC and slow down tumor growth. Given the presence of hypoxia  
247 and CAF heterogeneity in most solid tumors (9,38), targeting hypoxic signaling in the tumor  
248 stroma might be a generalizable strategy to impair cancer progression.

## 249 **Methods**

250

### 251 **Mouse experiments**

252 All animal experiments described adhered to policies and practices approved by Memorial  
253 Sloan Kettering Cancer Center's Institutional Animal Care and Use Committee (IACUC) and  
254 were conducted as per NIH guidelines for animal welfare (Protocol Number 11-03-007, Animal  
255 Welfare Assurance Number FW00004998). The maximal tumor size/burden permitted by the  
256 IACUC (Tumor burden may not exceed 10% of the weight of the mouse which is equivalent to a  
257 tumor volume of 2.5 cm<sup>3</sup> for a 25 g mouse) was not exceeded. Mice were maintained under  
258 specific pathogen-free conditions and housed at 4-5 mice per cage at a 12-hour light/dark cycle  
259 at a relative humidity of 30% to 70% and room temperature of 22.2 ± 1.1°C, and were allowed  
260 access to food and water *ad libitum*. Mice were maintained in individually ventilated polysulfone  
261 cages with a stainless-steel wire bar lid and filter top on autoclaved aspen chip bedding. Mice  
262 were fed a closed-formula, natural-ingredient,  $\gamma$ -irradiated diet (5053 - PicoLab® Rodent Diet  
263 20, Purina LabDiet) which was surface decontaminated using "flash" sterilization (100°C for 1  
264 minute). Mice were provided reverse-osmosis acidified (pH 2.5 to 2.8, with hydrochloric acid)  
265 water. Cage bottoms were changed weekly, whereas the wire bar lid, filter top and water bottle  
266 were changed biweekly.

267

### 268 **Orthotopic organoid injection**

269 Orthotopic injections were performed as described (48). Organoids derived from pancreatic  
270 tumors of KPC (*Kras*<sup>LSL-G12D/+</sup>; *Trp53*<sup>LSL-R172H/+</sup>; *Pdx1-Cre*) in a C57BL/6 background were used.  
271 Syngeneic C57BL/6 mice were anesthetized with isoflurane and an incision was made in the left  
272 abdominal side. Organoids were dissociated from cultures with TrypLE (Thermo Fisher) and  
273 resuspended in 30  $\mu$ L growth factor reduced Matrigel (Corning). Approximately 1x10<sup>5</sup> cells were  
274 injected per recipient mouse into the tail region of the pancreas using a Hamilton Syringe.  
275 Successful injection was verified by the appearance of a fluid bubble without signs of  
276 intraperitoneal leakage. The abdominal wall was sutured with absorbable Vicryl sutures  
277 (Ethicon), and the skin was closed with wound clips (CellPoint Scientific Inc.). Mice were  
278 monitored for tumor development by ultrasound five weeks after injection and one/week  
279 afterwards using a Vevo 2100 System with a MS250 13-24MHz scan head (VisualSonics).  
280 When tumors were approximately 500 mm<sup>3</sup> in size, 60 mg/kg body weight of pimonidazole  
281 (Hypoxyprobe) in 0.9% saline was injected i.p. one hour before euthanasia. Tumors were  
282 collected, and half of the tumor was allocated for 10% formalin fixation for histological analysis,  
283 and the other half was used to generate single cell suspensions for flow cytometry analysis.

284

## 285 **Immunofluorescence staining of mouse PDAC tumors**

286 Automated multiplex IF was conducted using the Leica Bond BX staining system. Paraffin-  
287 embedded tissues were sectioned at 5  $\mu\text{m}$  and baked at 58°C for 1 hr. Slides were loaded in  
288 Leica Bond and immunofluorescence staining was performed as follows. Samples were  
289 pretreated with EDTA-based epitope retrieval ER2 solution (AR9640, Leica) for 20 min at 95°C.  
290 The quadruplex-plex antibody staining and detection was conducted sequentially. The primary  
291 antibodies against PDPN (0.05  $\mu\text{g}/\text{ml}$ , hamster, DSHB, 8.1.1), PIMO (0.12  $\mu\text{g}/\text{ml}$ , mouse,  
292 Hydroxyprobe Inc. MAB1), SMA (0.1  $\mu\text{g}/\text{ml}$ , rabbit, Abcam, ab5694) were used. For the rabbit  
293 antibody, Leica Bond Polymer anti-rabbit HRP was used, for the hamster antibody and the  
294 mouse antibody, rabbit anti-Hamster (Novex, A18891) and rabbit anti-mouse (Abcam,  
295 ab133469) secondary antibodies were used as linkers before the application of the Leica Bond  
296 Polymer anti-rabbit HRP. After that, Alexa Fluor tyramide signal amplification reagents (Life  
297 Technologies, B40953, B40958) or CF dye tyramide conjugates (Biotium, 92174, 96053) were  
298 used for detection. After each round of IF staining, Epitope retrieval was performed for  
299 denaturation of primary and secondary antibodies before another primary antibody was  
300 applied. After the run was finished, slides were washed in PBS and incubated in 5  $\mu\text{g}/\text{ml}$  4',6-  
301 diamidino-2-phenylindole (DAPI) (Sigma Aldrich) in PBS for 5 min, rinsed in PBS, and mounted  
302 in Mowiol 4–88 (Calbiochem). Slides were kept overnight at -20°C before imaging.

303

## 304 **Imaging and analysis**

305 Images from tissue sections of PDAC tumors were acquired with a Mirax Slide Scanner at 40x  
306 magnification. Images were analyzed in ImageJ. Pimonidazole<sup>+</sup> regions were located in each  
307 tissue section. Within each region, the number of PDPN<sup>+</sup> only pixels, SMA<sup>+</sup> only pixels, and  
308 double positive pixels were quantified. Thresholds were set manually for each channel and kept  
309 consistent for each image. Two sections per tumor were analyzed. Live images from PSC  
310 monocultures were acquired with a Leica SP5 Inverted confocal microscope with cells placed in  
311 an environmental chamber.

312

## 313 **Cell culture**

314 293T cells were obtained from ATCC (CRL-3216). PSCs were isolated from either wildtype  
315 C57BL/6 mice or  $\alpha\text{SMA-DsRed}$  mice (29) by differential centrifugation as previously described  
316 (49) and immortalized by spontaneous outgrowth. Two lines of PSCs were used throughout the  
317 study. KPC ( $Kras^{\text{LSL-G12D/+}}$ ;  $Trp53^{\text{LSL-R172H/+}}$ ; Pdx1-Cre) mouse PDAC cells and organoids were  
318 described before (48). All cells were cultured at 37°C in 5% CO<sub>2</sub> and 20% O<sub>2</sub> and were  
319 maintained in DMEM supplemented with 10% FBS (Gemini), 100 U/ml penicillin and 100  $\mu\text{g}/\text{ml}$   
320 streptomycin (1% P/S). For hypoxia experiments, cells were cultured in a hypoxia chamber

321 (Coy) set at 0.5% O<sub>2</sub>, 37°C and 5% CO<sub>2</sub> for 48h. Cells were verified as mycoplasma-free by the  
322 MycoAlert Mycoplasma Detection Kit (Lonza). Cells were treated with 2 ng/mL murine IL1 (211-  
323 11A, Peprotech) and TNFα (315-01A, Peprotech) as indicated (“cytokines”).

324

### 325 **Organoid culture**

326 Organoids were derived from pancreatic tumors of KPC (*Kras*<sup>LSL-G12D/+</sup>; *Trp53*<sup>LSL-R172H/+</sup>; *Pdx1-Cre*)  
327 mice in a C57BL/6 background and described before (48). Organoids were cultured 24-well  
328 plates in growth factor reduced (GFR) Matrigel (Corning) in advanced DMEM/F12  
329 supplemented with the following: 1% P/S, 2 mM glutamine, 1X B27 supplement (12634-028,  
330 Invitrogen), 50 ng/ml murine EGF (PMG8043, Peprotech), 100 ng/ml murine Noggin (250-38;  
331 Peprotech), 100 ng/ml human FGF10 (100-26; Peprotech), 10 nM human Leu-Gastrin I (G9145,  
332 Sigma), 1.25 mM N-acetylcysteine (A9165; Sigma), 10 mM nicotinamide (N0636; Sigma), and  
333 R-spondin1 conditioned media (10% final). Organoids were passaged with every 3-4 days. For  
334 PSC co-culture, confluent wells of organoids were dissociated with 1x TrypLE (12604013,  
335 Thermo Fisher) and plated at a splitting ratio of 1:5 (approximately 1x10<sup>4</sup> cells) together with  
336 8x10<sup>4</sup> αSMA-DsRed expressing PSCs in GFR Matrigel. Co-cultures were cultured with DMEM  
337 supplemented with 10% FBS (Gemini) and 1% P/S in 20% O<sub>2</sub> and 5% CO<sub>2</sub>. For experiments in  
338 hypoxia, co-cultures were placed in a hypoxia chamber (Coy) set at 0.5% O<sub>2</sub> for the last 48h of  
339 the experiment.

340

### 341 **MEMIC experiments**

342 MEMICs were fabricated and used as described in detail previously (31). In brief, MEMICs were  
343 3D printed in a 12-well format, and coverslips were glued at the bottom and the top to create  
344 inner and outer chambers. For each condition tested, one well was prepared without the  
345 coverslip on the top to create a control well without gradients. MEMICs were washed with water,  
346 UV-sterilized, washed twice with PBS and once with complete media before cell seeding. A 85  
347 μL cell suspension containing 2x10<sup>4</sup> PSCs was filled in the inner chamber. For the open wells,  
348 1.5 mL of a 1x10<sup>5</sup>/mL cell suspension was added to the entire well. Cells were allowed to settle  
349 for 1h, and 1.5 mL media was added in the outer chamber in wells plated with cells in the inner  
350 chamber. The next day, cells were mock-treated or treated with cytokines. The gradient was  
351 allowed to form for 48h, and cells were either imaged live or fixed with 4% paraformaldehyde for  
352 10 min, permeabilized with 0.1% Triton X-100, blocked with 2.5% bovine serum albumin in PBS,  
353 and stained for 1h with an anti-GFP antibody (A10262, Invitrogen). Wells were washed three  
354 times with PBS and incubated with an anti-chicken Alexa Fluor 488 coupled secondary antibody  
355 (A11039, Invitrogen) and Hoechst for nuclear staining for 30 min before being washed three  
356 times with PBS. Wells were imaged using BZ-X800 microscope from Keyence (20x

357 magnification) and stitched using the BZ-X800 analysis software. Images were processed using  
358 custom MATLAB scripts. GFP/UnaG and DsRed fluorescence intensities were quantified and  
359 plotted according to their distance to the opening of the well. For *per cell* fluorescence  
360 quantification, images were segmented using nuclear staining and dilated to include adjacent  
361 cytoplasmic areas creating a mask for each cell. Then total fluorescence was integrated for  
362 each cell using these masks. Image analysis code is available upon request.

363

### 364 **Ectopic gene expression and CRISPR/Cas9 mediated gene deletion**

365 Guide RNAs targeting murine *Hif1a* and *Vhl* were designed using GuideScan  
366 (<http://www.guidescan.com/>) and cloned into pLentiCRISPRv2 (Addgene 52961). The following  
367 guide sequences were used: TCGTTAGGCCAGTGAGAAA (*Hif1a* sg1),  
368 CAAGATGTGAGCTCACATTG (*Hif1a* sg2), CCGATCTTACCACCGGGCAC (*Vhl* sg1),  
369 GGCTCGTACCTCGGTAGCTG (*Vhl* sg2). Rosa26 targeting guides (Ctrl sg) were described  
370 before (25). To create IL6 and hypoxia reporters, a Gibson assembly-based modular assembly  
371 platform (GMAP) was used (50). HRE-dUnaG from pLenti-HRE-dUnaG (Addgene 124372), and  
372 a PGK driven hygromycin selection cassette from MSCV Luciferase PGK-hygro (Addgene  
373 18782) were amplified using primers containing overhangs with the homology sites for GMAP  
374 cloning and inserted into a lentiviral vector (LV 1-5; Addgene, 68411). IL6-EGFP from pmIL-  
375 6promoterEGFP (Addgene 112896), and a PGK driven blasticidin selection cassette from  
376 pMSCV-Blasticidin (Addgene 75085) were amplified for GMAP similarly and inserted into LV 1-  
377 5. Lentiviral particles were produced in 293T cells by using psPAX2 and pCMV-VSV-G  
378 packaging plasmids (Addgene 12260, 8454). Viral supernatant was collected after 48h, passed  
379 through a 0.45  $\mu$ m nylon filter and used to transduce PSCs in the presence of 8  $\mu$ g/mL  
380 polybrene (Sigma) overnight. Cells were subjected to puromycin (2  $\mu$ g/mL, Sigma), hygromycin  
381 (250  $\mu$ g/mL) or blasticidin (10  $\mu$ g/mL, Invivogen) antibiotic selection the following day. Polyclonal  
382 cell populations were used for the experiments.

383

384

### 385 **Western blot**

386 Lysates were generated by incubating cells in RIPA buffer (Millipore). 20-30  $\mu$ g of cleared lysate  
387 were analyzed by SDS-PAGE as previously described (25). The following primary antibodies  
388 were used: Vinculin (1:5000 dilution, Sigma, V9131),  $\beta$ -Actin (1:5000; Sigma, A5441), HIF-1 $\alpha$   
389 (1:1000, 10006421, Cayman), VHL (1:200, sc-5575, Santa Cruz), LDHA (1:1000, 2012S, Cell  
390 Signaling) and GFP (1:1000, 11814460001, Sigma). The following secondary antibodies were  
391 used: anti-rabbit HRP (1:5000, NA934V, GE) and anti-mouse HRP (1:5000, NA931, GE).

392

393

## 394 **Flow cytometry**

395 For analysis of PSC monocultures, cells were trypsinized, washed, stained with DAPI and  
396 analyzed on an LSRFortessa II (BD). Live cells (DAPI-) were analyzed for EGFP fluorescence.  
397 For organoid/PSC co-cultures, Matrigel was digested with Dispase (Corning), and cells and  
398 organoids were dissociated mechanically by pipetting up and down at least 30 times. PSCs  
399 were analyzed by gating for DAPI- and DsRed+ cells followed by analysis of EGFP  
400 fluorescence intensity. For analysis of CAFs from PDAC tumors arising from orthotopic injection  
401 of KPC organoids, tumors were minced and resuspended in 5 mL DMEM with 800 µg/mL  
402 Dispase (Sigma), 500 µg/mL Collagenase P (Sigma), 100 µg/mL Liberase TL (Roche), 100  
403 µg/mL DNaseI (Sigma), 100 µg/mL Hyaluronidase (Sigma). Samples were then transferred to  
404 C-tubes and processed using program 37C\_m\_TDK1\_2 on a gentleMACS Octo dissociator with  
405 heaters (Miltenyi Biotec). Dissociated tissue was passaged through a 40 µm cell strainer and  
406 centrifuged at 1500 rpm x 5 minutes. Red blood cells were lysed with ACK lysis buffer  
407 (A1049201, Thermo Fisher) for 1 minute, and tubes were filled up with PBS. Samples were  
408 centrifuged and resuspended in FACS buffer (PBS supplemented with 2% FBS) and stained  
409 with Ghost Dye Violet 510 (1:1000, Tonbo Biosciences) on ice for 10 min for discrimination of  
410 viable and non-viable cells. Samples were blocked with anti-CD16/32 (FC block, 1:100,  
411 Biolegend) for 15 minutes on ice and then incubated with the following antibodies (all from  
412 Biolegend) in Brilliant stain buffer (Thermo Fisher) for 30 minutes on ice: CD326-FITC (G8.8,  
413 1:50), CD45-BV711 (30-F11, 1:200), CD31-PE/Cy7 (390, 1:200), PDPN-APC/Cy7 (8.1.1,  
414 1:100), Ly6C-BV421 (HK1.4, 1:200). Samples were washed in FACS buffer and fixed and  
415 permeabilized with the Foxp3 / Transcription Factor Staining Buffer Set (00-5523-00, Thermo  
416 Fisher) according to the manufacturer's instructions. Samples were stained with anti-  
417 pimonidazole antibody (4.3.11.3, 1:50, Hypoxyprobe) in permeabilization buffer at 4°C over  
418 night. Samples were incubated with anti-mouse Alexa Fluor 647 (1:400, Thermo Fisher) in  
419 permeabilization buffer for 15 min at room temperature. Samples were resuspended in FACS  
420 buffer and analyzed on an LSRFortessa II by gating for Ghost Dye-, CD45-, CD31, CD326-,  
421 PDPN+ cells comparing Ly6C- with Ly6C+ cells. Compensation was performed with UltraComp  
422 eBeads (01-2222-42, Thermo Fisher). Data were analyzed with FlowJo software (BD).

423

## 424 **Quantification of gene expression**

425 Total RNA was isolated from fibroblasts with Trizol (Life Technologies) according to the  
426 manufacturer's instructions, and 1 µg RNA was used for cDNA synthesis using iScript (Bio-  
427 Rad). Quantitative real-time PCR (qPCR) analysis was performed in technical triplicates using

428 1:20 diluted cDNAs and 0.1  $\mu$ M forward and reverse primers together with Power SYBR Green  
429 (Life Technologies) in a QuantStudio 7 Flex (Applied Biosystems). Gene expression was  
430 quantified in Microsoft Excel 365 as relative expression ratio using primer efficiencies calculated  
431 by a relative standard curve. The geometric mean of the endogenous control genes *Actb* and  
432 *Rplp0* was used as reference sample. Primer pairs are as follows:  
433 TACCACCATGTACCCAGGCA (*Actb* FW), CTCAGGAGGAGCAATGATCTTGAT (*Actb* RV),  
434 AGATTCGGGATATGCTGTTGGC (*Rplp0* FW), TCGGGTCCTAGACCAGTGTTTC (*Rplp0* RV),  
435 CCATCATGCGTCTGGACTT ( $\alpha$ SMA FW), GGCAGTAGTCACGAAGGAATAG ( $\alpha$ SMA RV),  
436 CTTCCATCCAGTTGCCTTCT (*IL6* FW), CTCCGACTTGTGAAGTGGTATAG (*IL6* RV),  
437 GTGTCAACCACTGTGCTAGT (*Cxcl1* FW), CACACATGTCCTCACCTAATAC (*Cxcl1* RV),  
438 CATTGTCAAGTACAGTCCACACT (*Ldha* FW), TTCCAATACTCGGTTTTTGGGA (*Ldha* RV).

439

#### 440 **RNA sequencing**

441 Total RNA was isolated with Trizol as above, and libraries were prepared from polyA-selected  
442 mRNA using the TruSeq RNAsample preparation kit v2 (Illumina) according to the  
443 manufacturer's instructions. Libraries were sequenced using an Illumina HiSeq 4000 generating  
444 150 bp paired-end reads. An average of 58 million reads per sample was retrieved. Adaptor  
445 sequences were removed from fastq files with Trimmomatic v.0.36, and trimmed reads were  
446 mapped to the mus musculus GRCm38 reference genome using the STAR aligner v.2.5.2b.  
447 Aligned features were counted with featureCounts from the Subread package v.1.5.2 and  
448 differential expression was determined using DESeq2 v3.10 from Bioconductor in R v4.1.0.

449

#### 450 **Gene set enrichment analysis (GSEA)**

451 GSEA was performed using a pre-ranked gene list based on the log<sub>2</sub> fold change comparing  
452 two Ctrl sg samples cultured in Normoxia against two Ctrl sg samples cultured in Hypoxia for  
453 48h, or comparing two Ctrl sg samples cultured in Hypoxia against two *Hif1a* sg7 samples  
454 cultured in Hypoxia. GSEA 4.3.0 (Broad Institute) was used with 1000 permutations and mouse  
455 gene symbols remapped to human orthologs v7.5 (MSigDB). Enrichment of the iCAF signature  
456 (4) or Hallmark signatures (MSigDB) was analyzed.

457

#### 458 **Statistics**

459 A student's *t*-test was applied to compare one variable between two groups. One-way ANOVA  
460 was applied to compare one variable between three or more groups. Two-way ANOVA was  
461 applied to compare two independent variables between two groups. Correction for multiple  
462 comparisons was done using the Holm-Sidak method. Statistical analysis was done in

463 GraphPad Prism 9. Most graphs show the mean + SD with individual datapoints, unless  
464 indicated otherwise in the figure legends.

465

## 466 **Acknowledgments**

467 We thank the members of the Thompson laboratory for helpful discussions. We are thankful to  
468 Tullia Lindsten for help with planning of and protocol preparation for mouse experiments, and to  
469 Natalya N. Pavlova for help with GMAP. We also thank Elisa De Stanchina and Inna Kudos  
470 from the MSKCC Antitumor Assessment Core for help with orthotopic organoid injections into  
471 the pancreas, and Wenfei Kang and Eric Rosiek of the MSKCC Molecular Cytology Core for  
472 help with immunofluorescence staining, microscopy and image analysis. S.S. receives support  
473 from the NCI (1K99CA259224) and the Alan and Sandra Gerry Metastasis and Tumor  
474 Ecosystems Center at MSKCC. S.S. was also supported by the Human Frontier Science  
475 Program (LT000854/2018). K.M.T. was supported by the Jane Coffin Childs Memorial Fund for  
476 Medical Research and a Shulamit Katzman Endowed Postdoctoral Research Fellowship. This  
477 work was supported by MSKCC's David Rubenstein Center for Pancreatic Research Pilot  
478 Project (to S.W.L.) and NIH grant P01CA013106 (to S.W.L.). S.W.L. is an Investigator of the  
479 Howard Hughes Medical Institute and the Geoffrey Beene Chair for Cancer Biology at MSKCC.  
480 C.C.F. receives support from the National Cancer Institute at the NIH (DP2 CA250005), the  
481 American Cancer Society (RSG-21-179-01-TBE) and the Pew Charitable Trust (00034121).  
482 C.B.T. was supported by the NCI (R01CA201318). This work used core facilities at MSKCC that  
483 were supported by the cancer center support grant (P30CA008748).

484

## 485 **Competing interests:**

486 C.B.T. is a founder of Agios Pharmaceuticals and a member of its scientific advisory board. He  
487 is also a former member of the Board of Directors and stockholder of Merck and Charles River  
488 Laboratories. He holds patents related to cellular metabolism. S.W.L. is a consultant and holds  
489 equity in Blueprint Medicines, ORIC Pharmaceuticals, Mirimus, Inc., PMV Pharmaceuticals,  
490 Faeth Therapeutics, and Constellation Pharmaceuticals. All other authors do not declare any  
491 conflict of interest.

492

## 493 **Author Contributions**

494 S.S. conceived the project, performed most experiments, analyzed data, interpreted results, and  
495 wrote and edited the manuscript. M.R. performed, analyzed and interpreted MEMIC  
496 experiments. K.M.T. assisted with experiments using KPC organoids, ultrasound monitoring and  
497 collection of PDAC tumors. F.V.C. provided technical assistance. S.W.L. and C.C.F. provided



498 support for PDAC and MEMIC experiments, respectively. C.B.T. interpreted results, and wrote  
499 and edited the manuscript. All authors participated in discussing and finalizing the manuscript.  
500

501 **References**

- 502 1. Orth M, Metzger P, Gerum S, Mayerle J, Schneider G, Belka C, et al. Pancreatic ductal  
503 adenocarcinoma: Biological hallmarks, current status, and future perspectives of  
504 combined modality treatment approaches. *Radiat Oncol. Radiation Oncology*; 2019;14:1–  
505 20.
- 506 2. Helms E, Onate MK, Sherman MH. Fibroblast Heterogeneity in the Pancreatic Tumor  
507 Microenvironment. *Cancer Discov.* 2020;10:648–56.
- 508 3. Chen Y, Kim J, Yang S, Wang H, Wu C-J, Sugimoto H, et al. Type I collagen deletion in  
509  $\alpha$ SMA+ myofibroblasts augments immune suppression and accelerates progression of  
510 pancreatic cancer. *Cancer Cell [Internet]. Elsevier Inc.*; 2021;39:548-565.e6. Available  
511 from: <http://www.ncbi.nlm.nih.gov/pubmed/33667385>
- 512 4. Öhlund D, Handly-Santana A, Biffi G, Elyada E, Almeida AS, Ponz-Sarvisé M, et al.  
513 Distinct populations of inflammatory fibroblasts and myofibroblasts in pancreatic cancer. *J*  
514 *Exp Med [Internet].* 2017;214:579–96. Available from:  
515 <http://www.jem.org/lookup/doi/10.1084/jem.20162024>
- 516 5. Elyada E, Bolisetty M, Laise P, Flynn WF, Courtois ET, Burkhart RA, et al. Cross-species  
517 single-cell analysis of pancreatic ductal adenocarcinoma reveals antigen-presenting  
518 cancer-associated fibroblasts. *Cancer Discov.* 2019;9:1102–23.
- 519 6. Dominguez CX, Muller S, Keerthivasan S, Koeppen H, Hung J, Gierke S, et al. Single-cell  
520 RNA sequencing reveals stromal evolution into LRRRC15+ myofibroblasts as a  
521 determinant of patient response to cancer immunotherapy. *Cancer Discov.* 2019;CD-19-  
522 0644.
- 523 7. Hosein AN, Huang H, Wang Z, Parmar K, Du W, Huang J, et al. Cellular heterogeneity  
524 during mouse pancreatic ductal adenocarcinoma progression at single-cell resolution. *J*  
525 *Clin Oncol.* 2019;37:e15739–e15739.
- 526 8. Özdemir BC, Pentcheva-Hoang T, Carstens JL, Zheng X, Wu CC, Simpson TR, et al.  
527 Depletion of carcinoma-associated fibroblasts and fibrosis induces immunosuppression  
528 and accelerates pancreas cancer with reduced survival. *Cancer Cell.* 2014;25:719–34.
- 529 9. Biffi G, Tuveson DA. Diversity and Biology of Cancer-Associated Fibroblasts. *Physiol*  
530 *Rev.* 2021;101:147–76.
- 531 10. Biffi G, Oni TE, Spielman B, Hao Y, Elyada E, Park Y, et al. IL1-induced Jak/STAT  
532 signaling is antagonized by TGF $\beta$  to shape CAF heterogeneity in pancreatic ductal  
533 adenocarcinoma. *Cancer Discov.* 2019;9:282–301.
- 534 11. Nicolas AM, Pesic M, Engel E, Ziegler PK, Diefenhardt M, Kennel KB, et al. Inflammatory  
535 fibroblasts mediate resistance to neoadjuvant therapy in rectal cancer. *Cancer Cell.*

- 536 2022;40:168-184.e13.
- 537 12. Lee BY, Hogg EKJ, Below CR, Kononov A, Blanco-Gomez A, Heider F, et al.  
538 Heterocellular OSM-OSMR signalling reprograms fibroblasts to promote pancreatic  
539 cancer growth and metastasis. *Nat Commun* [Internet]. 2021;12:7336. Available from:  
540 <http://www.ncbi.nlm.nih.gov/pubmed/34921158>
- 541 13. Mace TA, Shakya R, Pitarresi JR, Swanson B, McQuinn CW, Loftus S, et al. IL-6 and PD-  
542 L1 antibody blockade combination therapy reduces tumour progression in murine models  
543 of pancreatic cancer. *Gut* [Internet]. 2018;67:320–32. Available from:  
544 <http://www.ncbi.nlm.nih.gov/pubmed/27797936>
- 545 14. Zhang Y, Yan W, Collins MA, Bednar F, Rakshit S, Zetter BR, et al. Interleukin-6 is  
546 required for pancreatic cancer progression by promoting MAPK signaling activation and  
547 oxidative stress resistance. *Cancer Res*. 2013;73:6359–74.
- 548 15. Koong AC, Mehta VK, Le QT, Fisher GA, Terris DJ, Brown JM, et al. Pancreatic tumors  
549 show high levels of hypoxia. *Int J Radiat Oncol Biol Phys* [Internet]. 2000;48:919–22.  
550 Available from: <http://www.ncbi.nlm.nih.gov/pubmed/11072146>
- 551 16. Kamphorst JJ, Nofal M, Commisso C, Hackett SR, Lu W, Grabocka E, et al. Human  
552 pancreatic cancer tumors are nutrient poor and tumor cells actively scavenge  
553 extracellular protein. *Cancer Res*. 2015;75:544–53.
- 554 17. Majmundar AJ, Wong WJ, Simon MC. Hypoxia-Inducible Factors and the Response to  
555 Hypoxic Stress. *Mol Cell* [Internet]. Elsevier Inc.; 2010;40:294–309. Available from:  
556 <http://dx.doi.org/10.1016/j.molcel.2010.09.022>
- 557 18. Miller BW, Morton JP, Pinese M, Saturno G, Jamieson NB, McGhee E, et al. Targeting  
558 the LOX / hypoxia axis reverses many of the features that make pancreatic cancer  
559 deadly: inhibition of LOX abrogates metastasis and enhances drug efficacy . *EMBO Mol*  
560 *Med*. 2015;7:1063–76.
- 561 19. Tao J, Yang G, Zhou W, Qiu J, Chen G, Luo W, et al. Targeting hypoxic tumor  
562 microenvironment in pancreatic cancer. *J Hematol Oncol* [Internet]. BioMed Central;  
563 2021;14:1–25. Available from: <https://doi.org/10.1186/s13045-020-01030-w>
- 564 20. Gilkes DM, Semenza GL, Wirtz D. Hypoxia and the extracellular matrix: Drivers of tumour  
565 metastasis. *Nat Rev Cancer* [Internet]. Nature Publishing Group; 2014;14:430–9.  
566 Available from: <http://dx.doi.org/10.1038/nrc3726>
- 567 21. Erkan M, Reiser-Erkan C, Michalski CW, Deucker S, Sauliunaite D, Streit S, et al.  
568 Cancer-stellate cell interactions perpetuate the hypoxia-fibrosis cycle in pancreatic ductal  
569 adenocarcinoma. *Neoplasia* [Internet]. Neoplasia Press, Inc.; 2009;11:497–508. Available  
570 from: <http://dx.doi.org/10.1593/neo.81618>

- 571 22. Kugeratski FG, Atkinson SJ, Neilson LJ, Lilla S, Knight JRP, Serneels J, et al. Hypoxic  
572 cancer-associated fibroblasts increase NCBP2-AS2/HIAR to promote endothelial  
573 sprouting through enhanced VEGF signaling. *Sci Signal*. 2019;12:1–18.
- 574 23. Madsen CD, Pedersen JT, Venning FA, Singh LB, Moendarbary E, Charras G, et al.  
575 Hypoxia and loss of PHD2 inactivate stromal fibroblasts to decrease tumour stiffness and  
576 metastasis. *EMBO Rep* [Internet]. 2015;16:1394–408. Available from:  
577 <http://embor.embopress.org/cgi/doi/10.15252/embr.201540107>
- 578 24. Moncada R, Barkley D, Wagner F, Chiodin M, Devlin JC, Baron M, et al. Integrating  
579 microarray-based spatial transcriptomics and single-cell RNA-seq reveals tissue  
580 architecture in pancreatic ductal adenocarcinomas. *Nat Biotechnol* [Internet]. 2020;  
581 Available from: <https://www.nature.com/articles/s41587-019-0392-8>
- 582 25. Schwörer S, Berisa M, Violante S, Qin W, Zhu J, Hendrickson RC, et al. Proline  
583 biosynthesis is a vent for TGF $\beta$ -induced mitochondrial redox stress. *EMBO J* [Internet].  
584 2020;39:e103334. Available from:  
585 <https://onlinelibrary.wiley.com/doi/abs/10.15252/emj.2019103334>
- 586 26. Boj SF, Hwang C II, Baker LA, Chio IIC, Engle DD, Corbo V, et al. Organoid models of  
587 human and mouse ductal pancreatic cancer. *Cell*. 2015;160:324–38.
- 588 27. Hingorani SR, Wang L, Multani AS, Combs C, Deramaudt TB, Hruban RH, et al.  
589 Trp53R172H and KrasG12D cooperate to promote chromosomal instability and widely  
590 metastatic pancreatic ductal adenocarcinoma in mice. *Cancer Cell*. 2005;7:469–83.
- 591 28. Varia MA, Calkins-Adams DP, Rinker LH, Kennedy AS, Novotny DB, Fowler WC, et al.  
592 Pimonidazole: A Novel Hypoxia Marker for Complementary Study of Tumor Hypoxia and  
593 Cell Proliferation in Cervical Carcinoma. *Gynecol Oncol* [Internet]. 1998;71:270–7.  
594 Available from: <http://www.sciencedirect.com/science/article/pii/S0090825898951630>
- 595 29. Lebleu VS, Taduri G, O'Connell J, Teng Y, Cooke VG, Woda C, et al. Origin and function  
596 of myofibroblasts in kidney fibrosis. *Nat Med*. 2013;19:1047–53.
- 597 30. Helmlinger G, Yuan F, Dellian M, Jain RK. Interstitial pH and pO<sub>2</sub> gradients in solid  
598 tumors in vivo: High-resolution measurements reveal a lack of correlation. *Nat Med*.  
599 1997;3:177–82.
- 600 31. Janská L, Anandi L, Kirchberger NC, Marinkovic ZS, Schachtner LT, Guzelsoy G, et al.  
601 The MEMIC is an ex vivo system to model the complexity of the tumor microenvironment.  
602 *DMM Dis Model Mech*. 2021;14.
- 603 32. Carmona-Fontaine C, Deforet M, Akkari L, Thompson CB, Joyce JA, Xavier JB.  
604 Metabolic origins of spatial organization in the tumor microenvironment. *Proc Natl Acad Sci*  
605 *Sci* [Internet]. 2017;114:2934–9. Available from:

- 606 <http://www.pnas.org/lookup/doi/10.1073/pnas.1700600114>
- 607 33. Erapaneedi R, Belousov V V, Schäfers M, Kiefer F. A novel family of fluorescent hypoxia  
608 sensors reveal strong heterogeneity in tumor hypoxia at the cellular level. *EMBO J*.  
609 2016;35:102–13.
- 610 34. Lum JJ, Bui T, Gruber M, Gordan JD, DeBerardinis RJ, Covelto KL, et al. The  
611 transcription factor HIF-1alpha plays a critical role in the growth factor-dependent  
612 regulation of both aerobic and anaerobic glycolysis. *Genes Dev*. 2007;21:1037–49.
- 613 35. Maxwell PH, Wiesener MS, Chang GW, Clifford SC, Vaux EC, Cockman ME, et al. The  
614 tumour suppressor protein VHL targets hypoxia-inducible factors for oxygen-dependent  
615 proteolysis. *Nature*. 1999;399:271–5.
- 616 36. Schwörer S, Pavlova NN, Cimino F V., King B, Cai X, Sizemore GM, et al. Fibroblast  
617 pyruvate carboxylase is required for collagen production in the tumor microenvironment.  
618 *Nat Metab*. 2021;in press.
- 619 37. Hwang RF, Moore T, Arumugam T, Ramachandran V, Amos KD, Rivera A, et al. Cancer-  
620 Associated Stromal Fibroblasts Promote Pancreatic Tumor Progression. *Cancer Res*.  
621 2008;918–27.
- 622 38. Petrova V, Annicchiarico-Petruzzelli M, Melino G, Amelio I. The hypoxic tumour  
623 microenvironment. *Oncogenesis* [Internet]. Springer US; 2018;7. Available from:  
624 <http://dx.doi.org/10.1038/s41389-017-0011-9>
- 625 39. Eltzschig HK, Carmeliet P. Hypoxia and inflammation. *N Engl J Med* [Internet].  
626 2011;364:656–65. Available from:  
627 <https://portlandpress.com/biochemist/article/39/4/34/475/Hypoxia-and-inflammation>
- 628 40. Hartmann G, Tschöp M, Fischer R, Bidlingmaier C, Riepl R, Tschöp K, et al. High altitude  
629 increases circulating interleukin-6, interleukin-1 receptor antagonist and C-reactive  
630 protein. *Cytokine*. 2000;12:246–52.
- 631 41. Gurtner GC, Werner S, Barrandon Y, Longaker MT. Wound repair and regeneration.  
632 *Nature*. 2008;453:314–21.
- 633 42. Mascharak S, desJardins-Park HE, Longaker MT. Fibroblast Heterogeneity in Wound  
634 Healing: Hurdles to Clinical Translation. *Trends Mol Med* [Internet]. Elsevier Ltd;  
635 2020;26:1101–6. Available from: <https://doi.org/10.1016/j.molmed.2020.07.008>
- 636 43. Schwörer S, Vardhana SA, Thompson CB. Cancer Metabolism Drives a Stromal  
637 Regenerative Response. *Cell Metab* [Internet]. 2019;29:576–91. Available from:  
638 <https://linkinghub.elsevier.com/retrieve/pii/S1550413119300154>
- 639 44. Van Uden P, Kenneth NS, Rocha S. Regulation of hypoxia-inducible factor-1 $\alpha$  by NF-  
640  $\kappa$ B. *Biochem J*. 2008;412:477–84.

- 641 45. Pawlus MR, Wang L, Hu CJ. STAT3 and HIF1 $\alpha$  cooperatively activate HIF1 target genes  
642 in MDA-MB-231 and RCC4 cells. *Oncogene*. 2014;33:1670–9.
- 643 46. Lappano R, Talia M, Cirillo F, Rigracciolo DC, Scordamaglia D, Guzzi R, et al. The IL1 $\beta$ -  
644 IL1R signaling is involved in the stimulatory effects triggered by hypoxia in breast cancer  
645 cells and cancer-associated fibroblasts (CAFs). *J Exp Clin Cancer Res. Journal of*  
646 *Experimental & Clinical Cancer Research*; 2020;39:1–22.
- 647 47. Garcia Garcia CJ, Huang Y, Fuentes NR, Turner MC, Monberg ME, Lin D, et al. Stromal  
648 HIF2 Regulates Immune Suppression in the Pancreatic Cancer Microenvironment.  
649 *Gastroenterology*. 2022;1–14.
- 650 48. Ruscetti M, Morris JP, Mezzadra R, Russell J, Leibold J, Romesser PB, et al.  
651 Senescence-Induced Vascular Remodeling Creates Therapeutic Vulnerabilities in  
652 Pancreas Cancer. *Cell* [Internet]. Elsevier Inc.; 2020;1–18. Available from:  
653 <http://www.ncbi.nlm.nih.gov/pubmed/32234521>
- 654 49. Jesnowski R, Fürst D, Ringel J, Chen Y, Schrödel A, Kleeff J, et al. Immortalization of  
655 pancreatic stellate cells as an in vitro model of pancreatic fibrosis: Deactivation is induced  
656 by matrigel and N-acetylcysteine. *Lab Investig*. 2005;85:1276–91.
- 657 50. Akama-Garren EH, Joshi NS, Tammela T, Chang GP, Wagner BL, Lee DY, et al. A  
658 Modular Assembly Platform for Rapid Generation of DNA Constructs. *Sci Rep. Nature*  
659 *Publishing Group*; 2016;6:1–9.
- 660

661 **Figure Legends**

662

663 **Figure 1:** A hypoxic signature is enriched in inflammatory fibroblasts in PDAC.

664 **(A)** Single sample Gene Set Enrichment Analysis (ssGSEA) of selected hallmark signatures in  
665 myofibroblastic CAFs (myCAFs) and inflammatory CAFs (iCAFs) based on single-cell RNA-  
666 sequencing (scRNA-seq) data from human PDAC. Data from (5).

667 **(B)** Schematic of experimental workflow to analyze Pimonidazole enrichment and localization in  
668 mouse PDAC tumors arising from orthotopic transplantation of KPC organoids.

669 **(C-E)** Analysis of Pimonidazole in Ly6C<sup>+</sup> and Ly6C<sup>-</sup> cells among live, CD31<sup>-</sup>CD45<sup>-</sup>EpCAM<sup>-</sup>  
670 PDPN<sup>+</sup> cells in PDAC tumors. **(C)** Gating for Ly6C in PDPN<sup>+</sup> cells. **(D)** Histogram of  
671 fluorescence intensity and **(E)** quantification of Pimonidazole median fluorescence intensity  
672 (MFI) comparing Ly6C<sup>+</sup> and Ly6C<sup>-</sup> cells. A.U. = arbitrary units. N=3 mice. P-value was  
673 calculated by ratio paired t-test.

674 **(F, G)** Immunofluorescence staining of Pimonidazole, PDPN and  $\alpha$ SMA in mouse PDAC  
675 tumors. **(F)** Representative image. Nuclei are labeled with DAPI. Scale bar = 500  $\mu$ m. **(G)**  
676 Quantification of  $\alpha$ SMA<sup>-</sup> and  $\alpha$ SMA<sup>+</sup> pixel among PDPN<sup>+</sup> pixel within Pimonidazole-stained  
677 regions. N=8 sections from 4 mice. Data represent mean+SD. P-value was calculated by ratio  
678 paired t-test.

679 **(H)** GSEA comparing PSCs cultured in normoxia (20% O<sub>2</sub>) or hypoxia (0.5% O<sub>2</sub>) for 48h. iCAF  
680 signature derived from (4). Other signatures represent Hallmark signatures from MSigDB. N=2  
681 biological replicates.

682

683 **Figure 2:** Hypoxia potentiates the cytokine-induced inflammatory fibroblast phenotype.

684 **(A, B)** Fluorescence intensity of *IL6*-EGFP expressing PSCs cultured in normoxia or hypoxia  
685 and mock-treated or treated with cytokines (IL1/TNF $\alpha$ ) for 48h. **(A)** Histogram of *IL6*-EGFP  
686 fluorescence intensity. **(B)** Quantification of the relative MFI of *IL6*-EGFP. N=3 biological  
687 replicates. Data represent mean+SD. P-values were calculated by two-way ANOVA.

688 **(C)** Representative images of *IL6*-EGFP and  $\alpha$ SMA-DsRed expressing PSCs cultured in  
689 normoxia or hypoxia and mock-treated or treated with cytokines for 48h. Scale bar = 200  $\mu$ m.

690 **(D-F)** MEMIC experiment. **(D)** Schematic of the MEMIC, adapted from (31,32). PSCs  
691 expressing *IL6*-EGFP were plated in the inner chamber and treated with cytokines the next day.  
692 Gradients were allowed to form for 48h. **(E)** Representative image. Cells were fixed and stained  
693 for GFP (*IL6*). Nuclei are labeled with DAPI. Scale bar = 500  $\mu$ m. Oxygen-rich **(E')** and oxygen-  
694 poor **(E'')** regions are highlighted. Scale bar = 100  $\mu$ m. **(F)** Quantification of GFP (*IL6*)  
695 fluorescence intensity per cell with increasing distance from the oxygen-rich opening. A.U. =

696 arbitrary units. N=15,027 nuclei. Line represents median. P-value was calculated by Pearson's  
697 Linear Correlation Coefficient.

698 **(G, H)** PSC/Tumor organoid co-culture experiment. PSCs expressing *IL6*-EGFP and  $\alpha$ SMA-  
699 DsRed were cultured alone or together with KPC organoids in Matrigel for five days. In the last  
700 48h, part of the cultures was incubated in hypoxia. **(G)** Histogram of *IL6*-EGFP fluorescence  
701 intensity in PSCs. **(H)** Quantification of the relative MFI of *IL6*-EGFP in PSCs. N=3 biological  
702 replicates. Data represent mean+SD. P-values were calculated by two-way ANOVA.

703

704 **Figure 3:** HIF-1 $\alpha$  mediates the hypoxia-induced inflammatory phenotype in fibroblasts

705 **(A)** Activity of a selected set of transcription factors in myCAFs and iCAFs based on scRNA-seq  
706 data from human PDAC. Data from (5).

707 **(B, C)** Western blots of **(B)** PSCs cultured in Normoxia or Hypoxia and **(C)** PSCs expressing  
708 control or *Hif1a* sgRNA and cultured in Hypoxia. Cells were mock-treated or treated with  
709 cytokines for 48h. Representative experiments are shown. Separate panels in (B) are from the  
710 same membrane with irrelevant lanes cut out.

711 **(D)** qPCR for the indicated transcripts in PSCs expressing control or *Hif1a* sgRNA and cultured  
712 in Normoxia or Hypoxia. N=3 biological replicates. Data represent mean+SD. P-values were  
713 calculated by one-way ANOVA.

714 **(E)** GSEA comparing PSCs expressing control or *Hif1a* sgRNA and cultured in Hypoxia for 48h.  
715 iCAF signature derived from (4). Other signatures represent Hallmark signatures from MSigDB.  
716 N=2 biological replicates.

717 **(F, G)** Fluorescence intensity of PSCs expressing *IL6*-EGFP and control or *Hif1a* sgRNA  
718 cultured in Normoxia or Hypoxia and mock-treated or treated with cytokines for 48h. **(F)**  
719 Histogram of *IL6*-EGFP fluorescence intensity in mock-treated cells. **(G)** Quantification of the  
720 relative MFI of *IL6*-EGFP. N=3 biological replicates. Data represent mean+SD. P-values were  
721 calculated by two-way ANOVA.

722 **(H, I)** Fluorescence intensity of PSCs expressing *IL6*-EGFP and control or *Hif1a* sgRNA co-  
723 cultured with KPC organoids for five days. In the last 48h, part of the cultures were incubated in  
724 Hypoxia. **(H)** Histogram of *IL6*-EGFP fluorescence intensity in PSCs cultured with organoids in  
725 Hypoxia. **(I)** Quantification of relative MFI of *IL6*-EGFP in PSCs. N=3 biological replicates. Data  
726 represent mean+SD. P-values were calculated by two-way ANOVA.

727

728 **Figure 4:** HIF-1 $\alpha$  stabilization in fibroblasts can be sufficient to promote an inflammatory  
729 phenotype and tumor growth.



730 **(A)** Western blot of PSCs expressing control or *Vhl* sgRNAs and cultured in normoxia. A  
731 representative experiment is shown.

732 **(B)** qPCR for the indicated transcripts in PSCs expressing control or *Vhl* sgRNA cultured in  
733 normoxia. N=3 biological replicates. Data represent mean+SD. P-values were calculated by  
734 Student's t-test.

735 **(C, D)** Fluorescence intensity of PSCs expressing *IL6*-EGFP and control or *Vhl* sgRNA cultured  
736 in normoxia and mock-treated or treated with cytokines for 48h. **(C)** Histogram of *IL6*-EGFP  
737 fluorescence intensity in mock-treated cells. **(D)** Quantification of the relative MFI of *IL6*-EGFP.  
738 N=3 biological replicates. Data represent mean+SD. P-values were calculated by two-way  
739 ANOVA.

740 **(E, F)** Fluorescence intensity of PSCs expressing *IL6*-EGFP and control or *Vhl* sgRNA co-  
741 cultured with KPC organoids for five days in normoxia. **(E)** Histogram of *IL6*-EGFP fluorescence  
742 intensity in PSCs. **(F)** Quantification of the relative MFI of *IL6*-EGFP in PSCs. N=3 biological  
743 replicates. Data represent mean+SD. P-values were calculated by two-way ANOVA.

744 **(G)** Growth curve of tumors arising from subcutaneous co-injection of KPC cells alone or  
745 together with PSCs expressing control of *Vhl* sgRNA. N=9 mice. Data represent mean+/-SEM.  
746 P-values were calculated by two-way ANOVA.

747

#### 748 **Supplementary Figure 1**

749 **(A)** qPCR for the indicated transcripts in PSCs cultured in Normoxia and mock-treated or  
750 treated with cytokines (IL1/TNF $\alpha$ ), or cultured in Hypoxia and treated with cytokines for 48h.  
751 N=3 biological replicates. Data represent mean+SD. P-values were calculated by one-way  
752 ANOVA.

753 **(B, C)** MEMIC experiments with hypoxia reporter. **(B)** Representative images of PSCs  
754 expressing  $\alpha$ SMA-DsRed and HRE-dUnaG, treated with cytokines and cultured in the MEMIC  
755 without a cover (no gradients, left) or with a cover (ischemia, right) for 48h. Scale bar = 500  $\mu$ m.

756 **(C)** Quantification of HRE-dUnaG (left) and  $\alpha$ SMA-DsRed (right) fluorescence intensity with  
757 increasing distance from the oxygen-rich opening. A.U. = arbitrary units, px = pixel.

758 **(D, E)** MEMIC experiments with IL6 reporter. **(D)** Representative images of PSCs expressing  
759  $\alpha$ SMA-DsRed and *IL6*-EGFP, treated with cytokines and cultured in the MEMIC without a cover  
760 (no gradients, left) or with a cover (ischemia, right) for 48h. Scale bar = 500  $\mu$ m. **(E)**  
761 Quantification of *IL6*-EGFP (left) and  $\alpha$ SMA-DsRed (right) fluorescence intensity with increasing  
762 distance from the oxygen-rich opening.

763

#### 764 **Supplementary Figure 2**

765 **(A-D)** PSC/Tumor organoid co-culture experiment. PSCs expressing *IL6*-EGFP and  $\alpha$ SMA-  
766 DsRed were cultured alone or together with KPC organoids for five days. **(A)** Histogram of *IL6*-  
767 EGFP fluorescence intensity in PSCs. **(B)** Quantification of the relative MFI of *IL6*-EGFP in  
768 PSCs. **(C)** Histogram of  $\alpha$ SMA-DsRed fluorescence intensity in PSCs. **(D)** Quantification of the  
769 relative MFI of  $\alpha$ SMA-DsRed in PSCs. N=3 biological replicates. Data represent mean+SD. P-  
770 values were calculated by Student's t-test.

771

### 772 **Supplementary Figure 3**

773 **(A)** Western blot of PSCs expressing *IL6*-EGFP that were mock treated, treated with 100  $\mu$ M  
774 CoCl<sub>2</sub>, cytokines or a combination thereof for 48h.

775 **(B, C)** Fluorescence intensity of *IL6*-EGFP expressing PSCs that were mock treated or treated  
776 with 100  $\mu$ M CoCl<sub>2</sub>, cytokines or a combination thereof for 48h. **(B)** Histogram of *IL6*-EGFP  
777 fluorescence intensity. **(C)** Quantification of relative MFI of *IL6*-EGFP. N=3 biological replicates.  
778 Data represent mean+SD. P-values were calculated by two-way ANOVA.

779 **(D)** Quantification of relative MFI in PSCs expressing *IL6*-EGFP and control or *Hif1a* sgRNA that  
780 were mock treated or treated with 100  $\mu$ M CoCl<sub>2</sub>, cytokines or a combination thereof for 48h.  
781 N=3 biological replicates. Data represent mean+SD. P-values were calculated by two-way  
782 ANOVA.

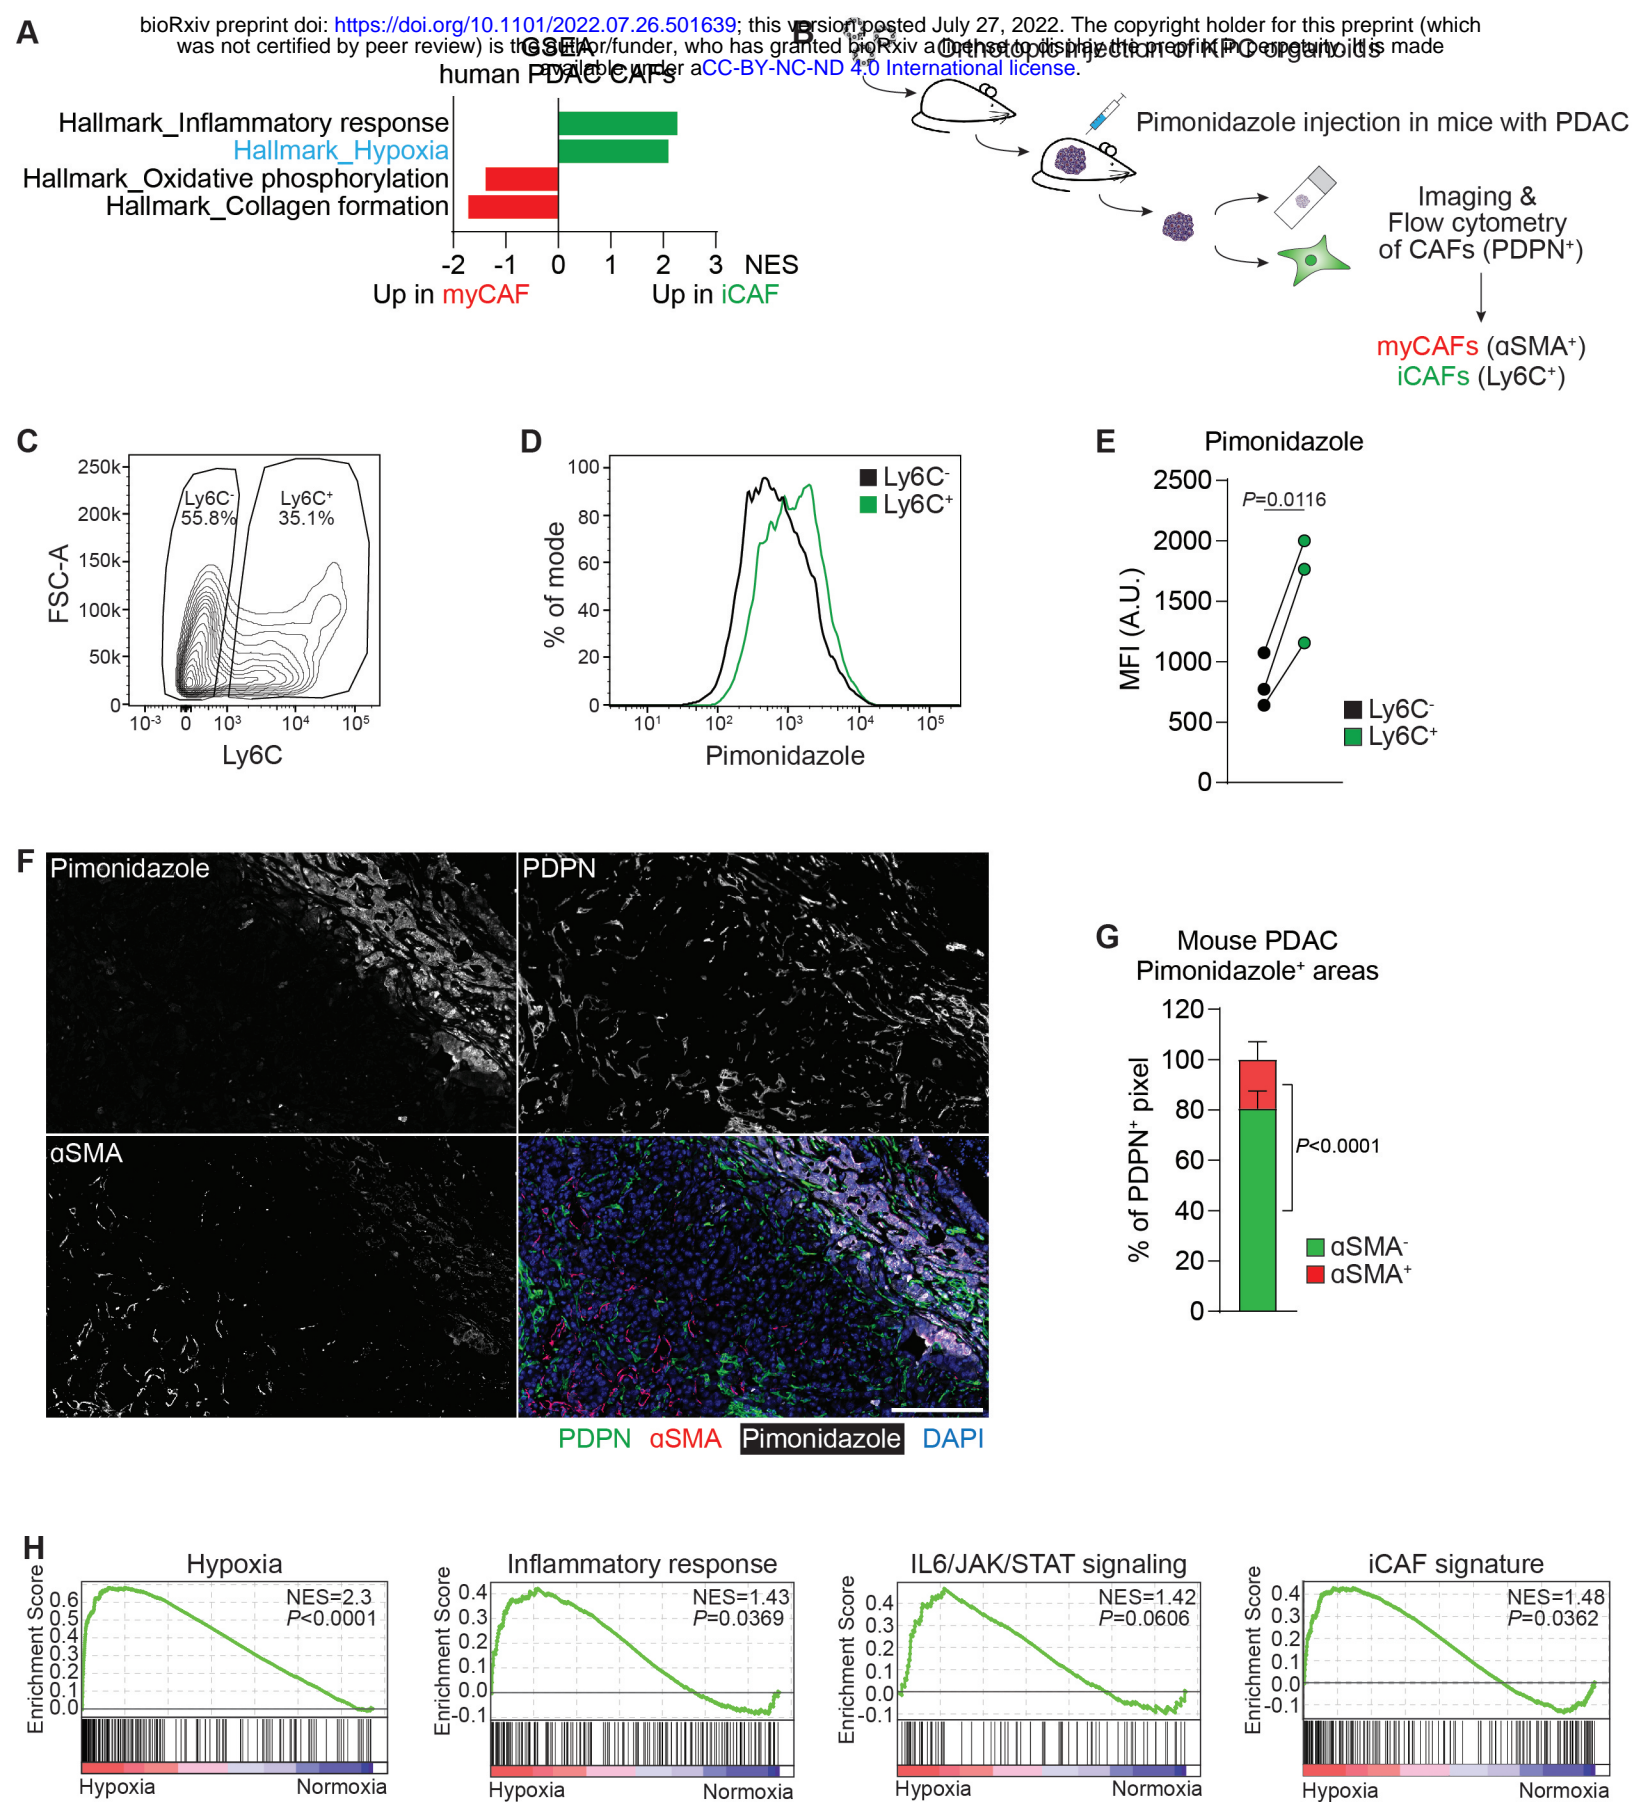

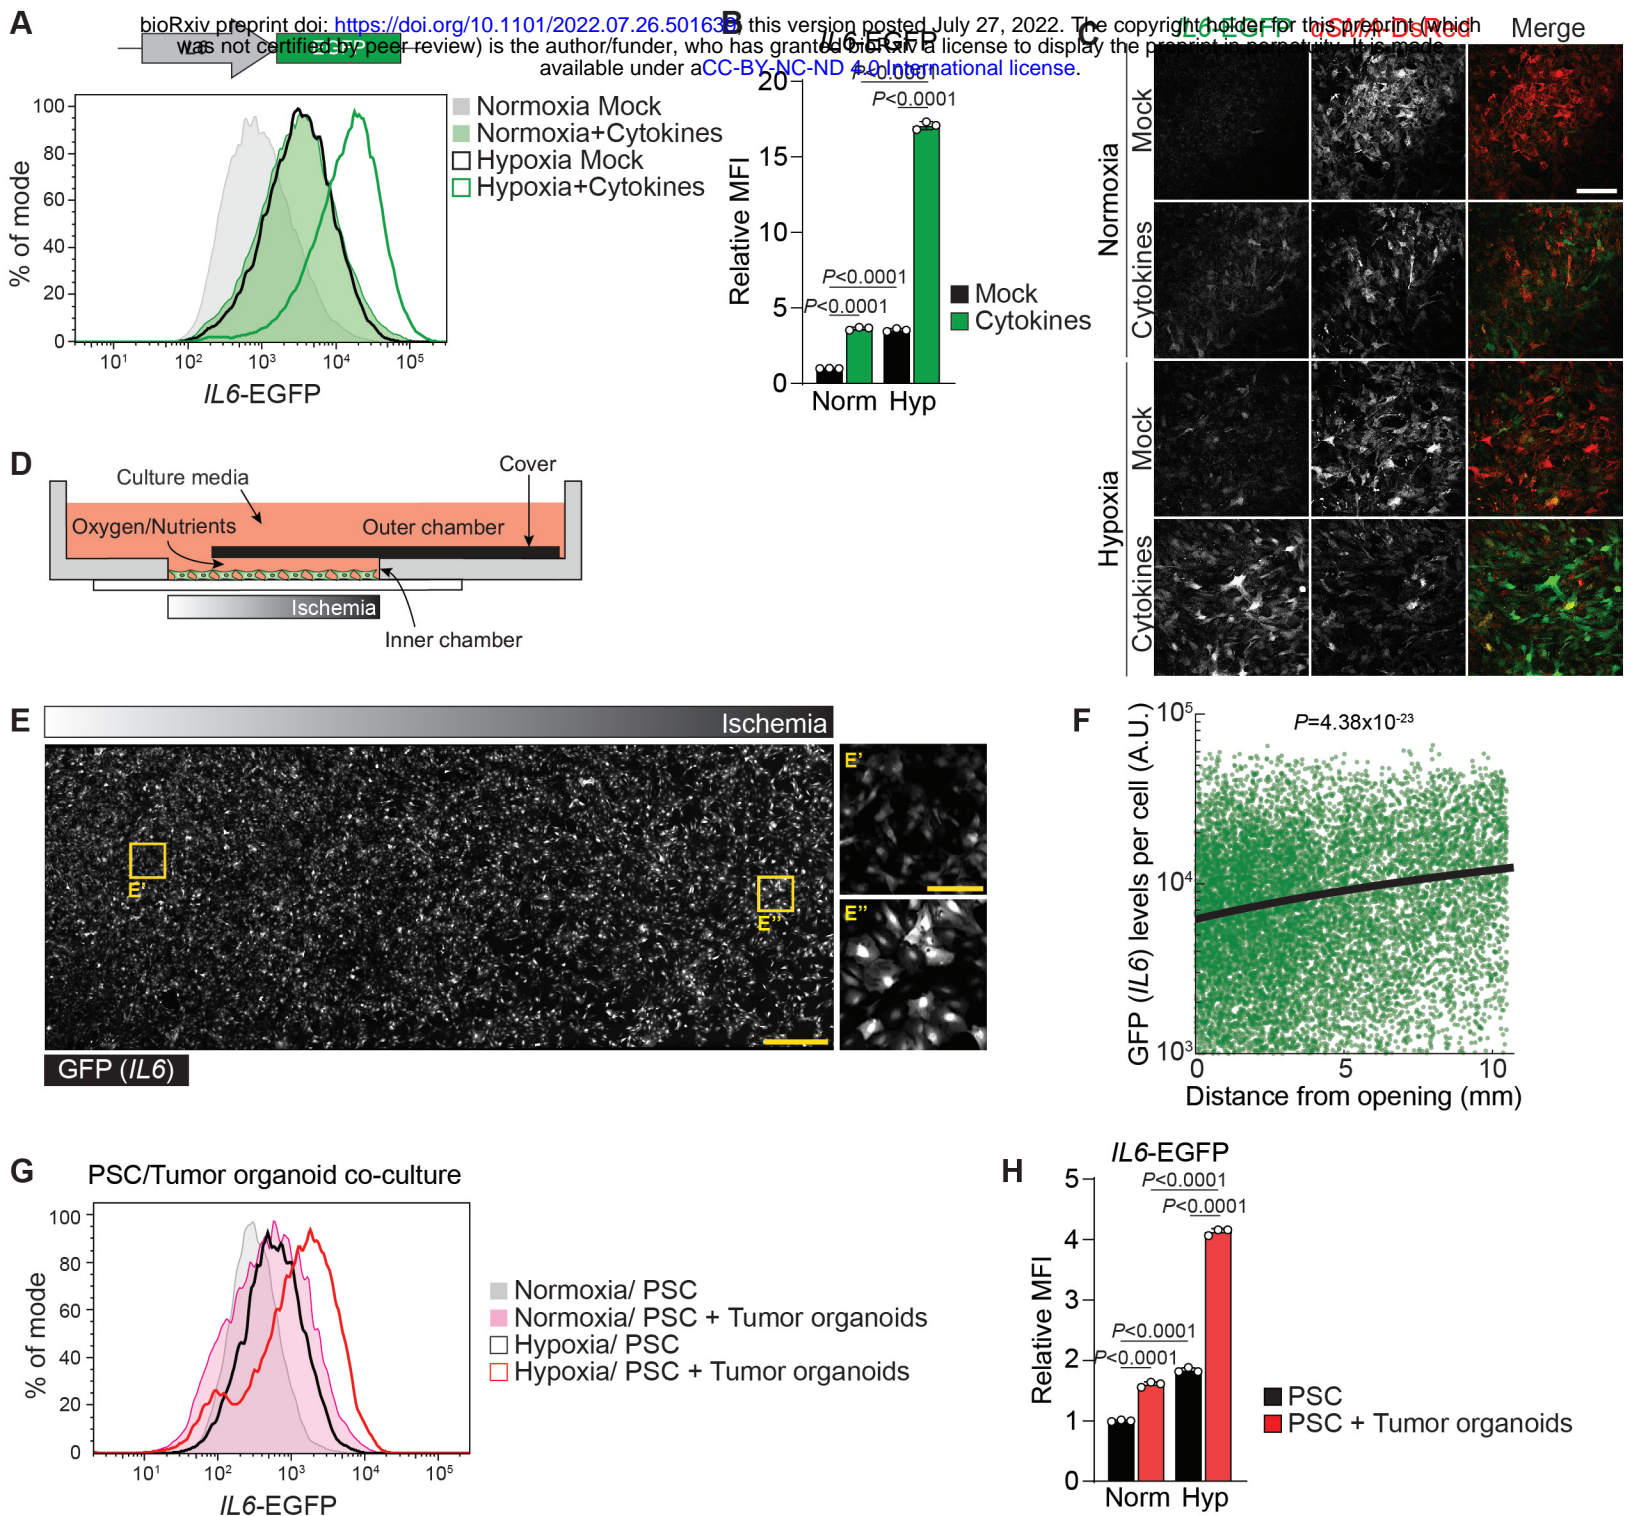

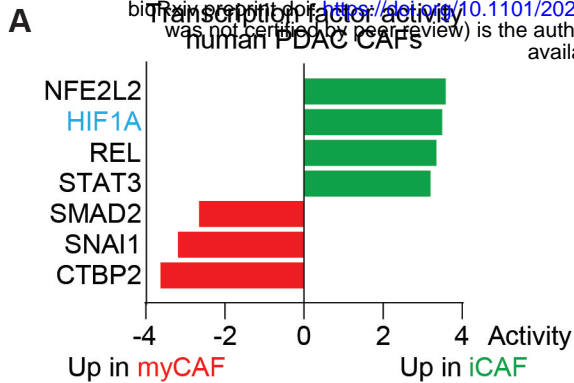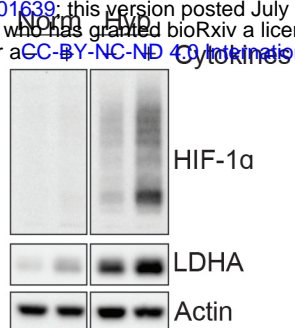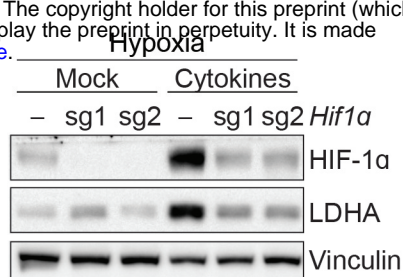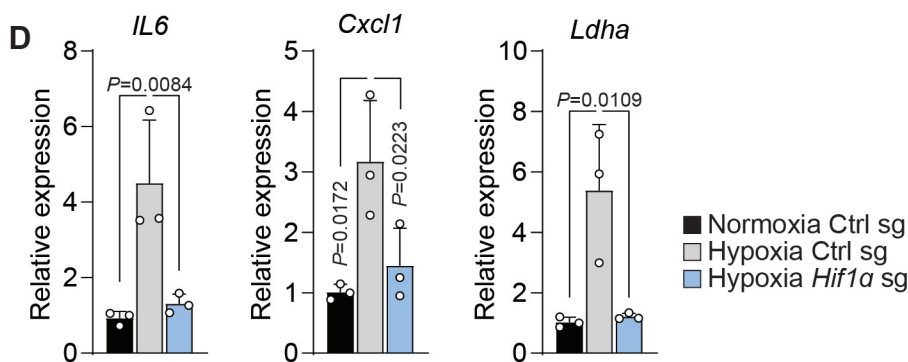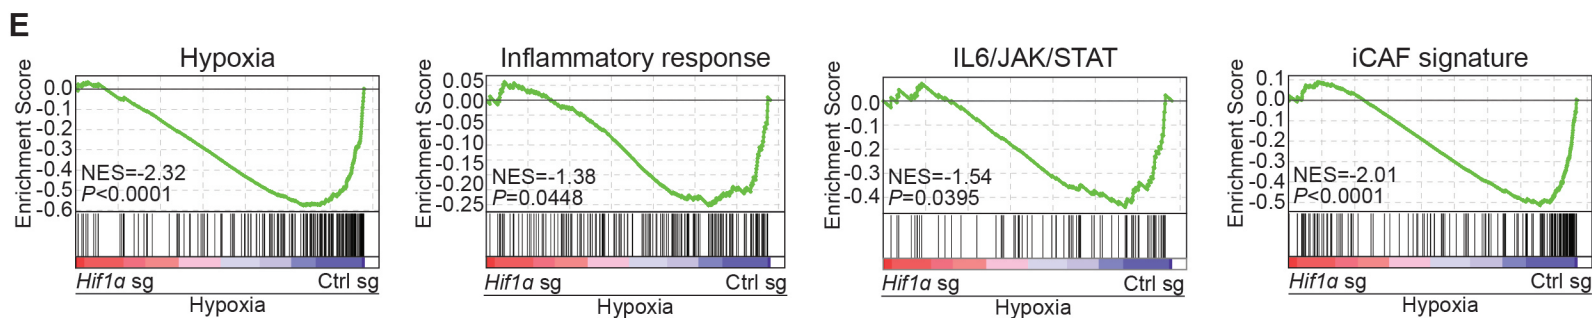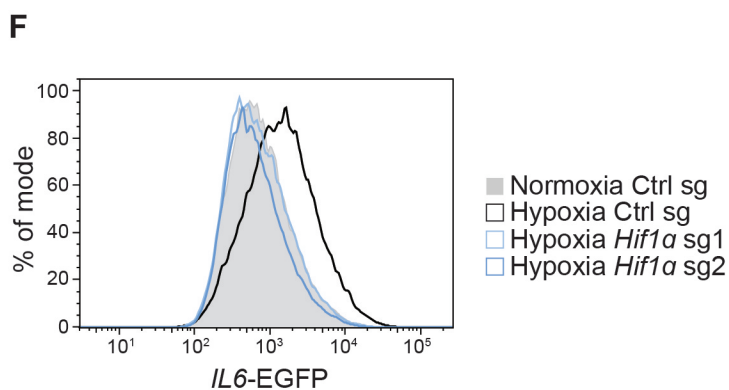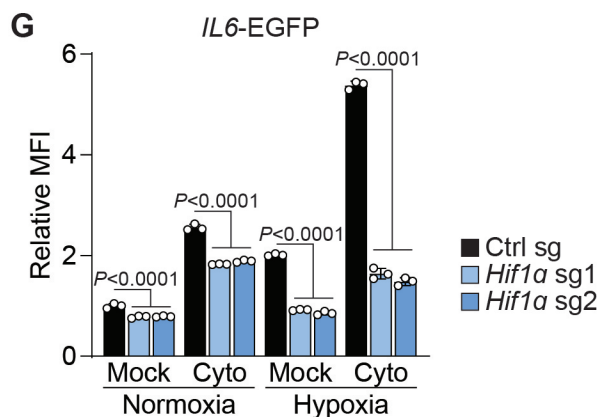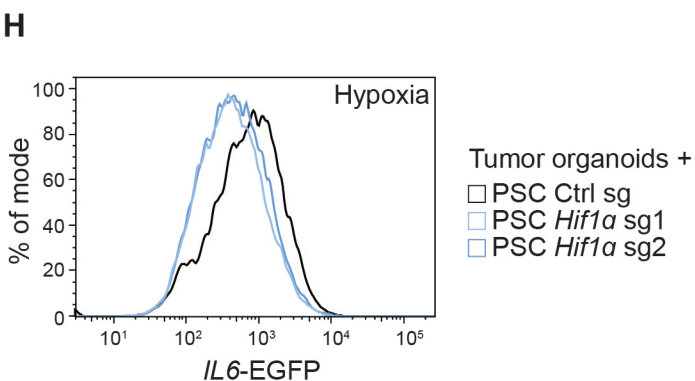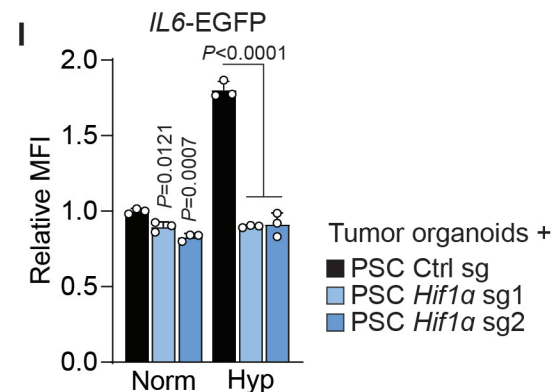

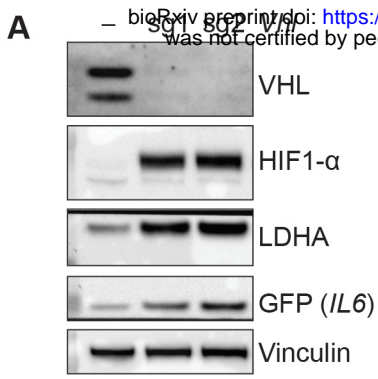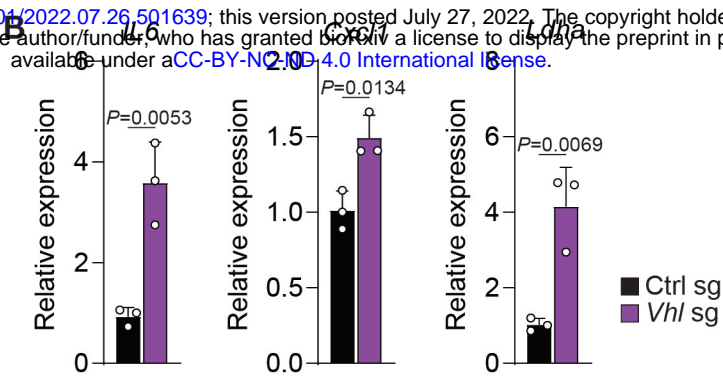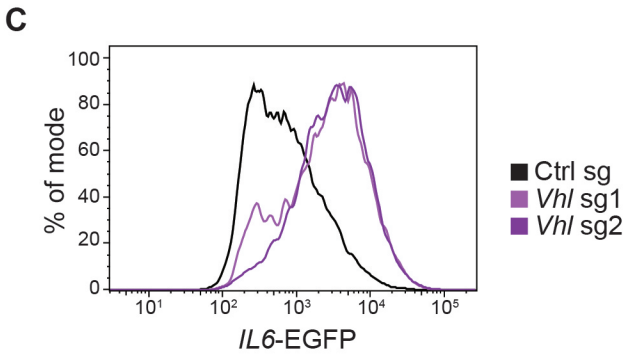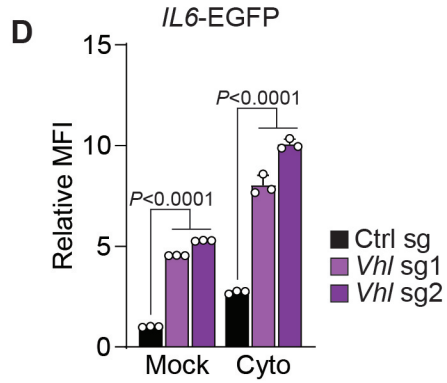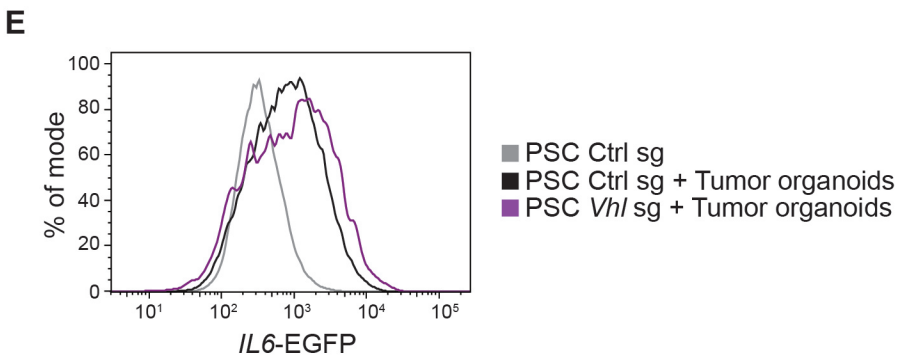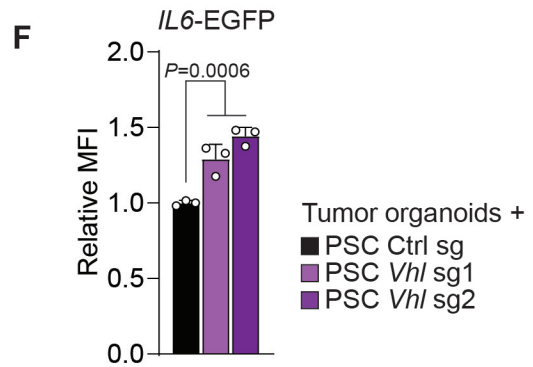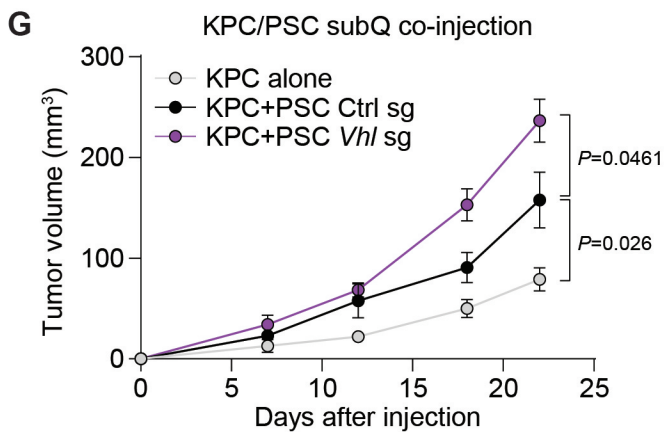

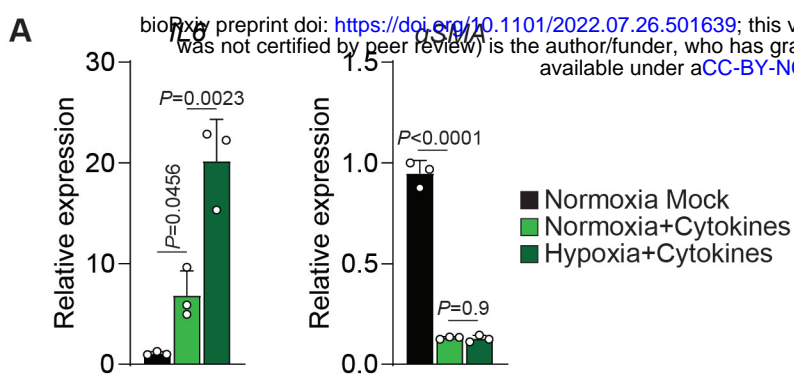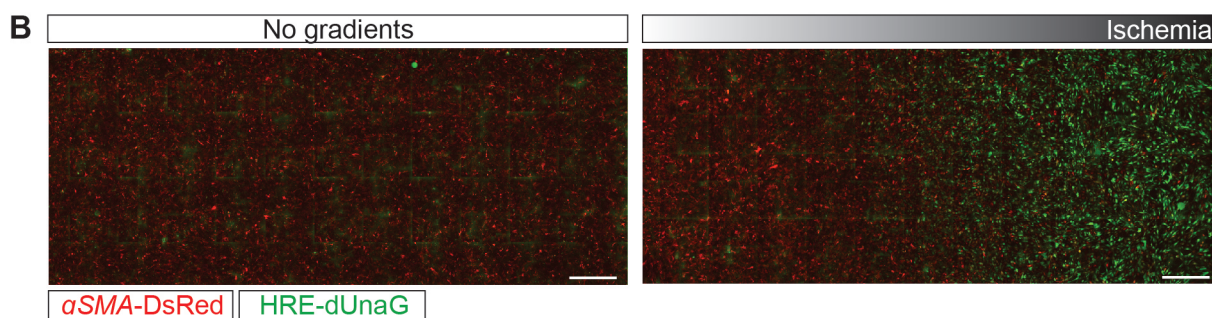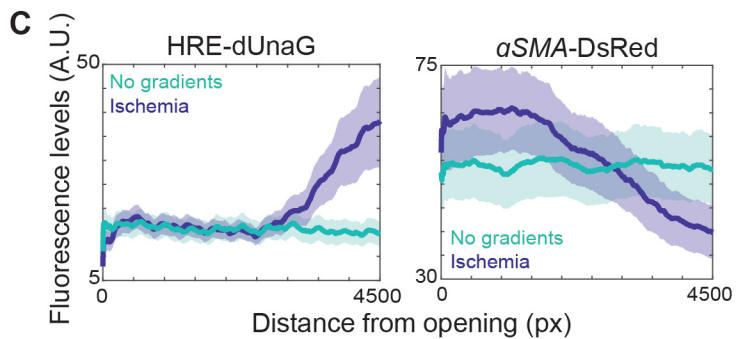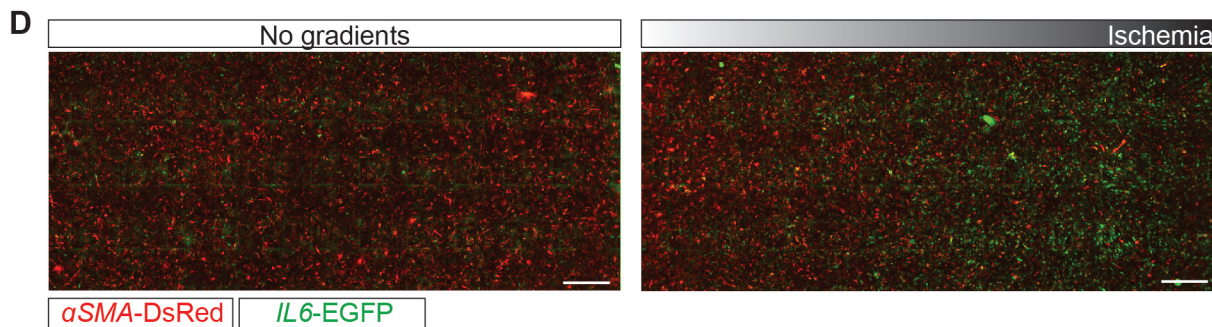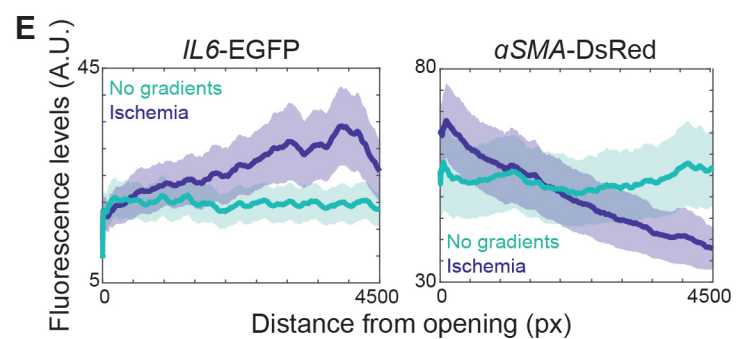

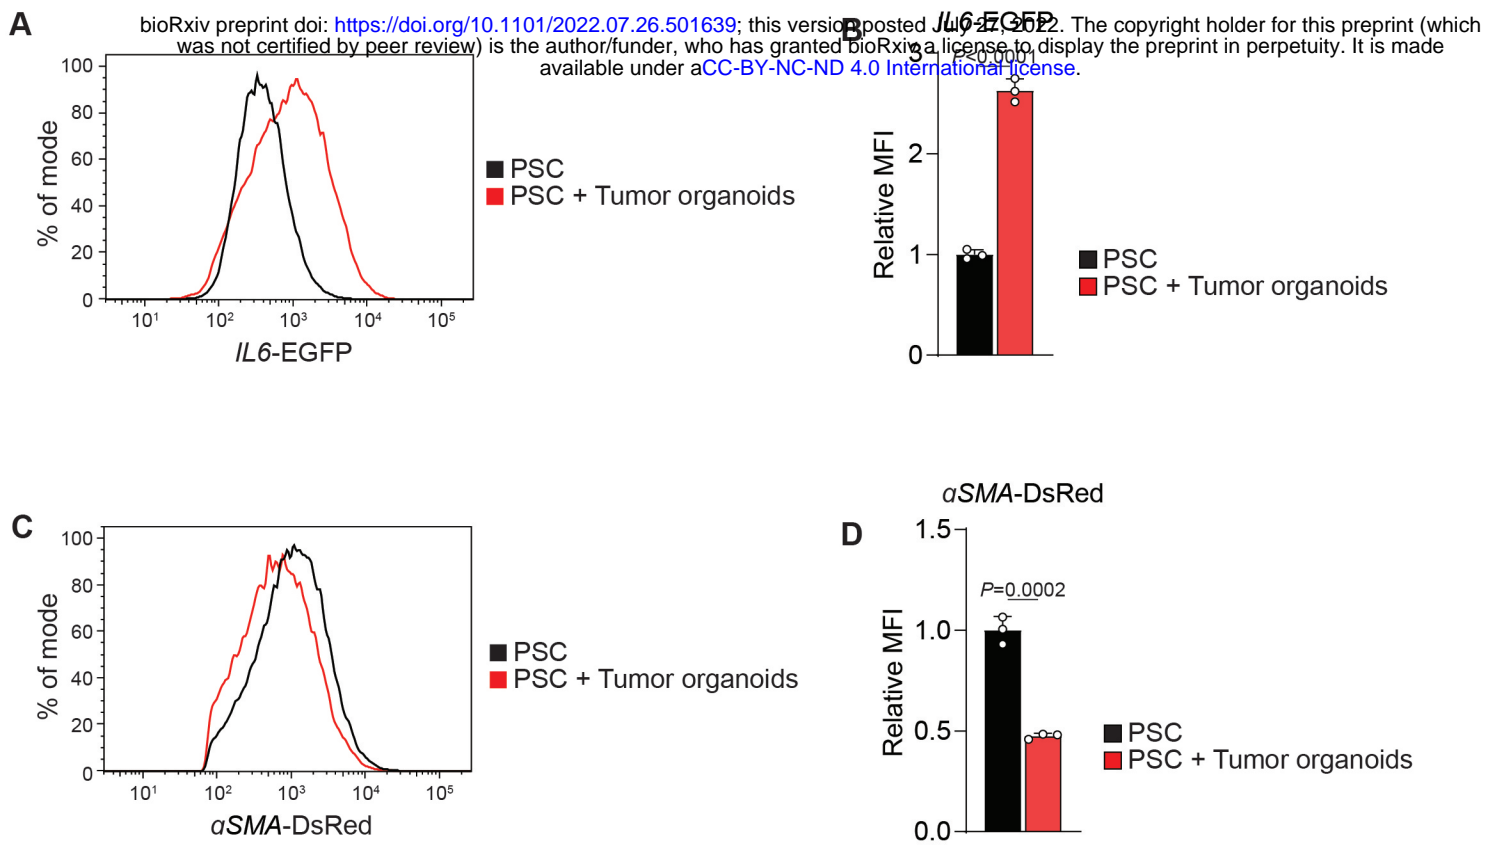



**A**

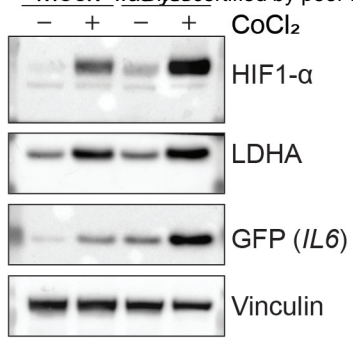

**B**

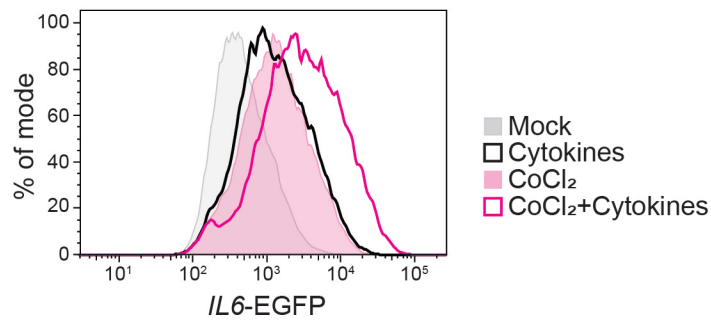

**C**

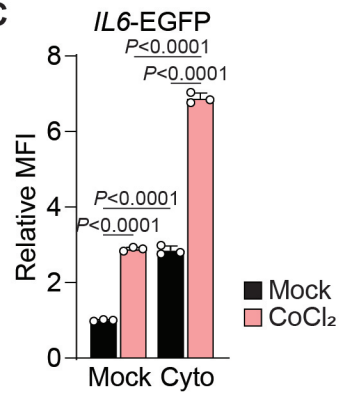

**D**

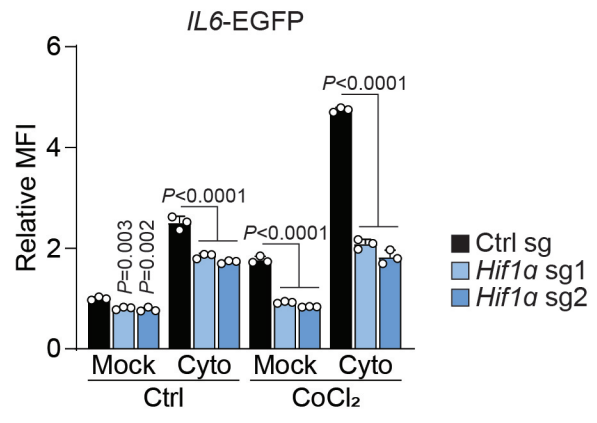

Source: https://www.biorxiv.org/content/10.1101/2022.07.26.501639v1.full.pdf
